# Supplementary material
Source: PubMed Central journal article supplement (PMC7246132)
Supplement: NIHMS1541892-supplement-1.pdf [file NIHMS1541892-supplement-1.pdf]

## Supplementary information

**Supplementary Table 1** Educational attainment measures\*

---

|                                            |                 |
|--------------------------------------------|-----------------|
| 1) College or University degree            | 1) ISCED 5 (20) |
| 2) A levels/AS levels or equivalent        | 2) ISCED 3      |
| 3) O levels/GCSEs or equivalent            | 3) ISCED 2      |
| 4) CSEs or equivalent                      | 4) ISCED 2      |
| 5) NVQ or HND or HNC or equivalent         | 5) ISCED (19)   |
| 6) Other prof. qual. eg: nursing, teaching | 6) ISCED 4      |
| 7) None of the above                       | 7) ISCED 1      |
| 8) Prefer not to answer                    | 8) Excluded     |

---

\*Data were obtained under question: “Which of the following qualifications do you have? (You can select more than one)”.

Categories are mapped onto years of education using the ISCED scale as follows: none of the above (no qualifications) = 7 years of education; CSEs or equivalent = 10 years; O levels/GCSEs or equivalent = 10 years; A levels/AS levels or equivalent = 13 years; other professional qualification = 15 years; NVQ or HNC or equivalent = 19 years; college or university degree = 20 years of education. Highest category assigned to respondents who selected multiple options[1].

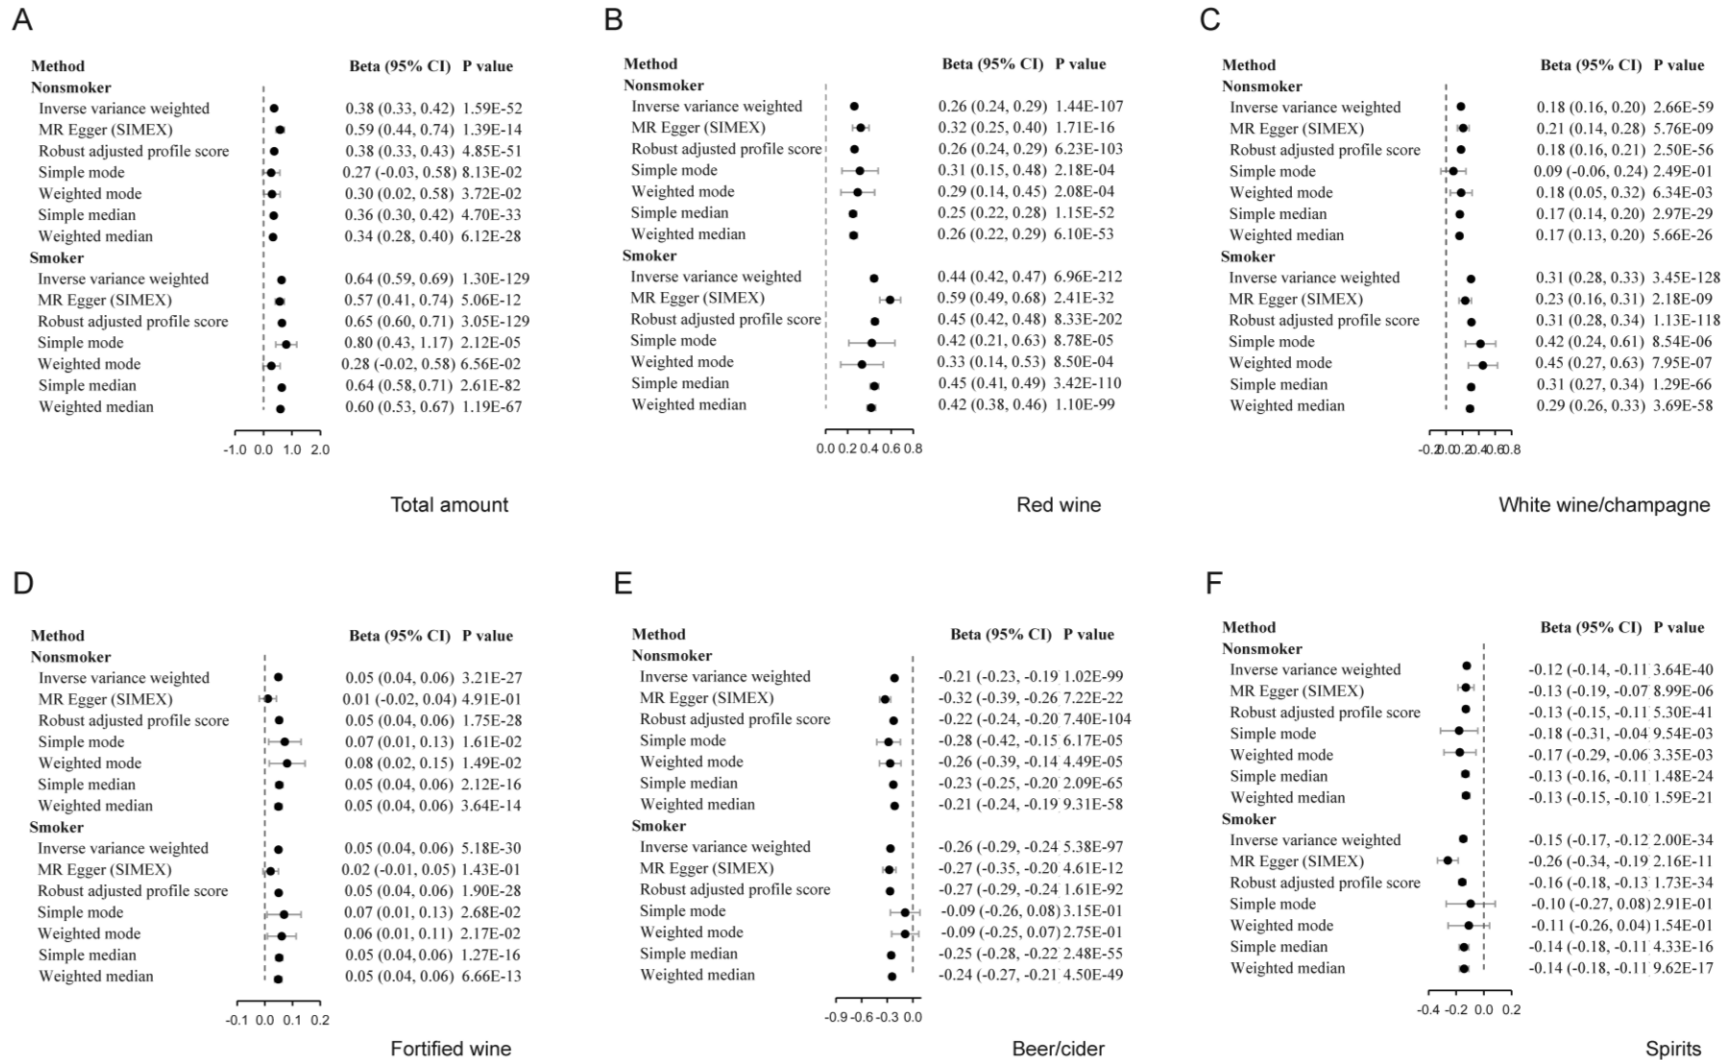

**Supplementary Figure 1** Associations of educational attainment and amount of total and specific alcohol intake from Mendelian Randomization (MR) analyses stratified by smoking status.

Panel A, the total amount of alcohol intake; panel B, red wine; panel C, white wine/champagne; panel D, fortified wine; panel E, beer/cider; panel F, spirits.

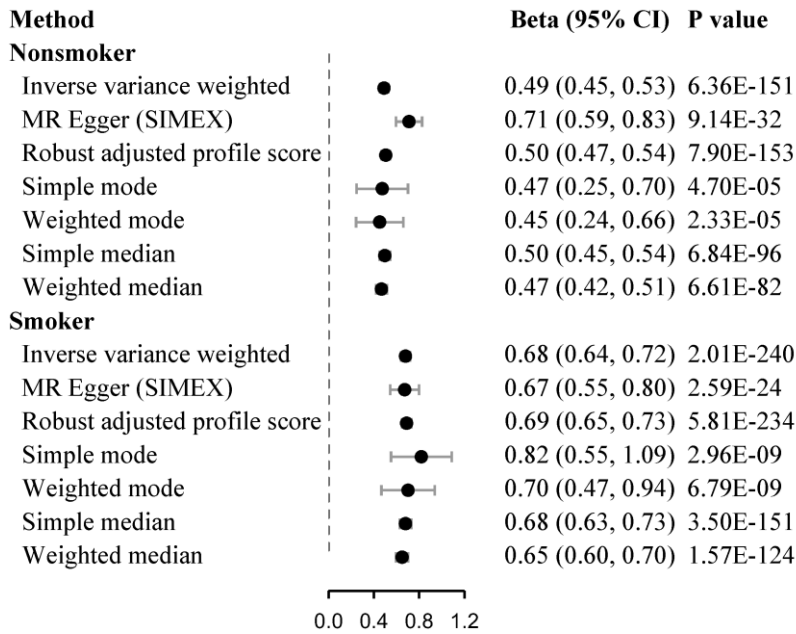

**Supplementary Figure 2** Associations of educational attainment and alcohol intake frequency from Mendelian Randomization (MR) analyses stratified by smoking status.

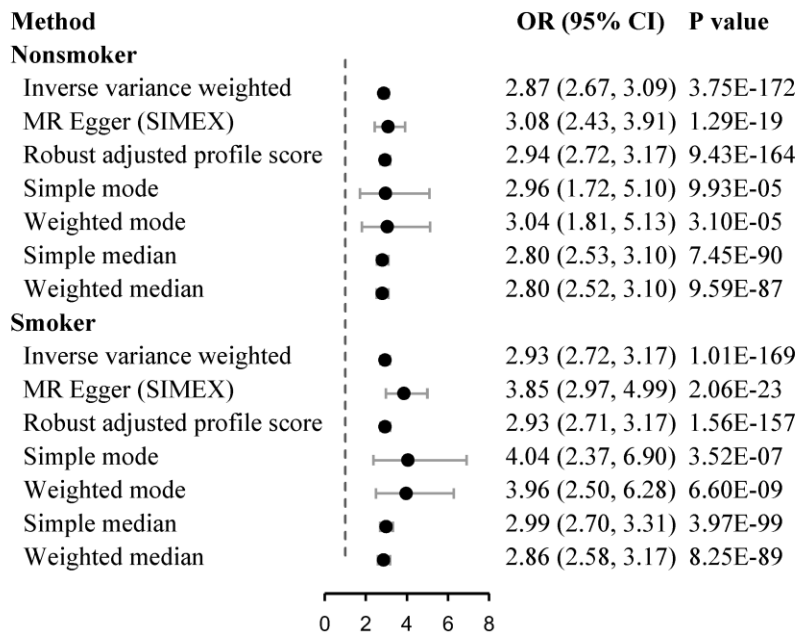

**Supplementary Figure 3** Associations of educational attainment and alcohol taken with meals from Mendelian Randomization (MR) analyses stratified by smoking status.

A

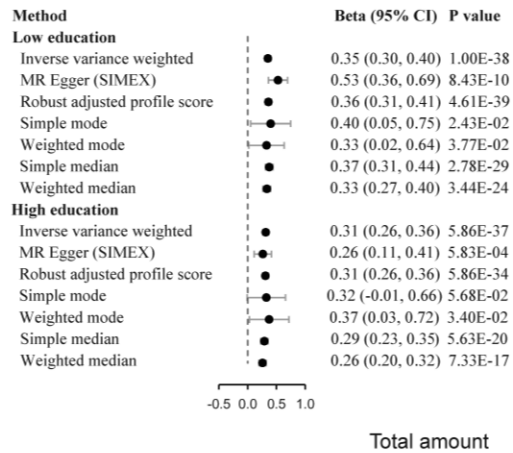

B

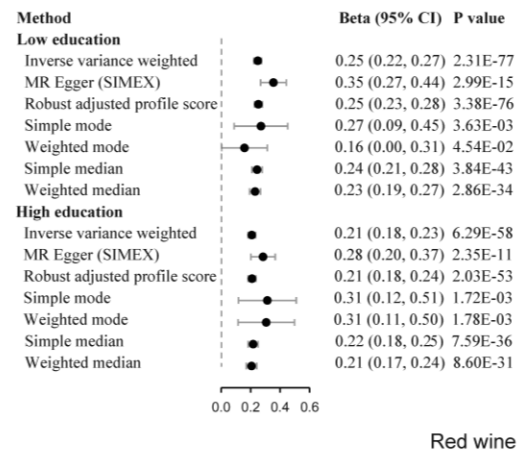

C

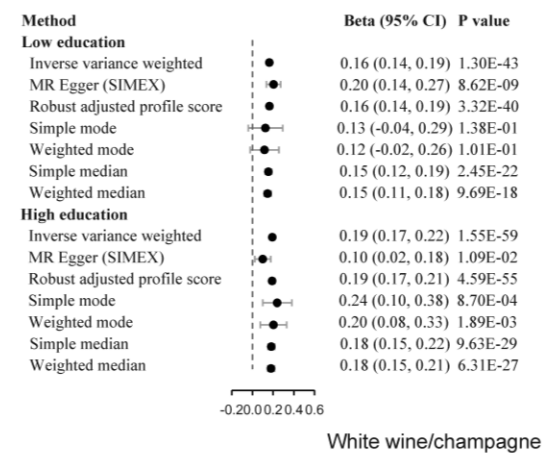

D

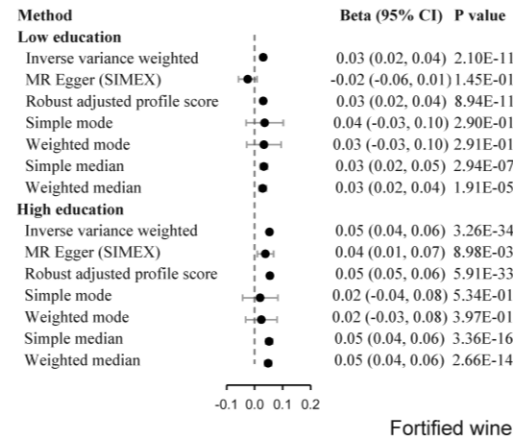

E

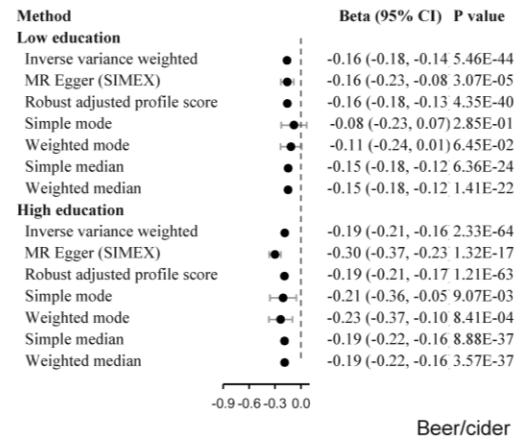

F

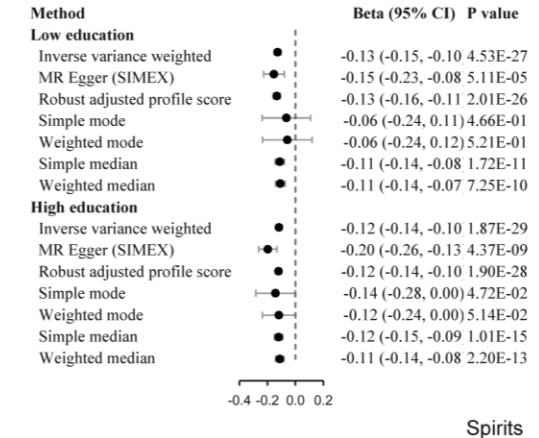

**Supplementary Figure 4** Associations of educational attainment and amount of total and specific alcohol intake from Mendelian Randomization (MR) analyses stratified by educational attainment.

Panel A, the total amount of alcohol intake; panel B, red wine; panel C, white wine/champagne; panel D, fortified wine; panel E, beer/cider; panel F, spirits. Education was dichotomized into less than 16 years and 16 years or more than 16 years.

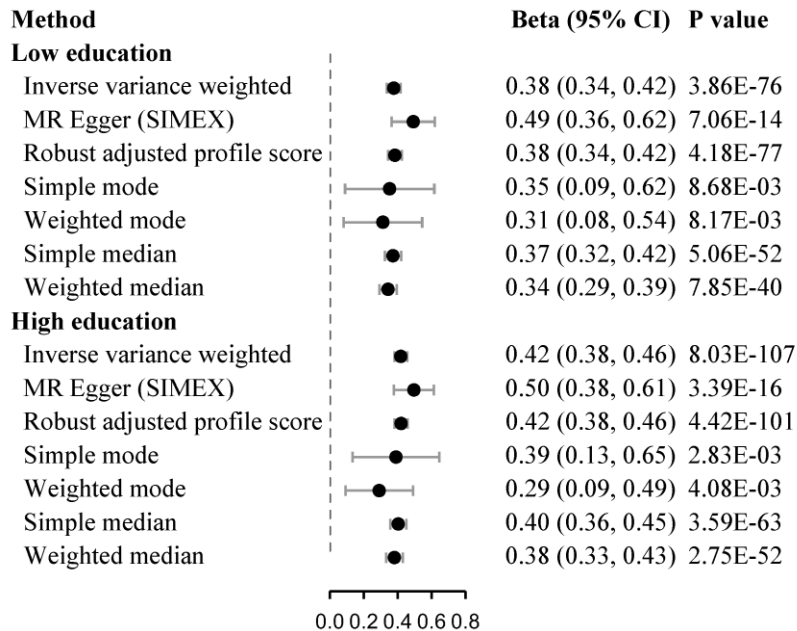

**Supplementary Figure 5** Associations of educational attainment and alcohol intake frequency from Mendelian Randomization (MR) analyses stratified by educational attainment. Education was dichotomized into less than 16 years and 16 years or more than 16 years.

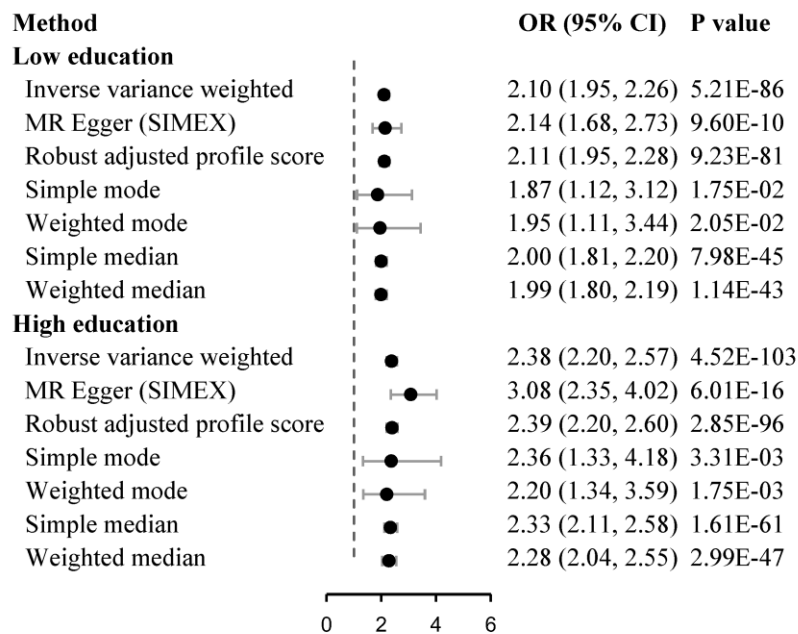

**Supplementary Figure 6** Associations of educational attainment and alcohol taken with meals from Mendelian Randomization (MR) analyses stratified by educational attainment. Education was dichotomized into less than 16 years and 16 years or more than 16 years.

A

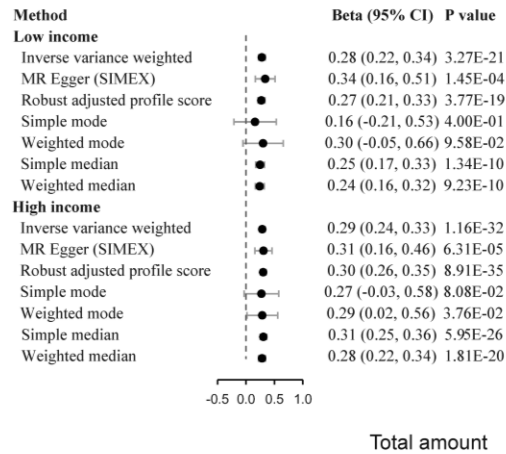

B

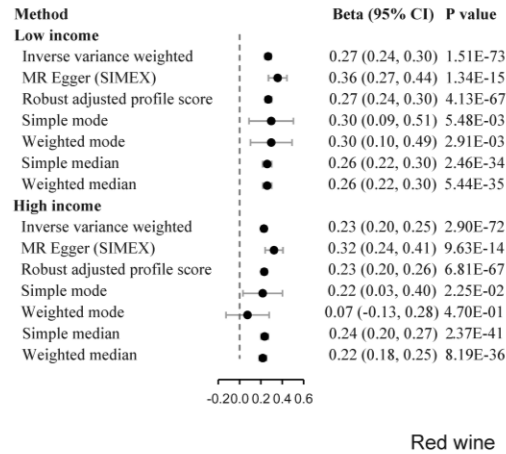

C

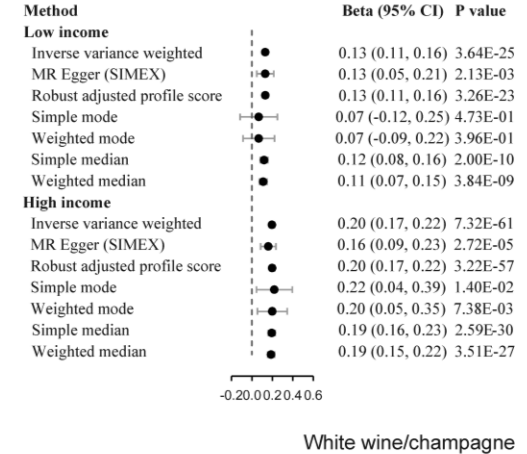

D

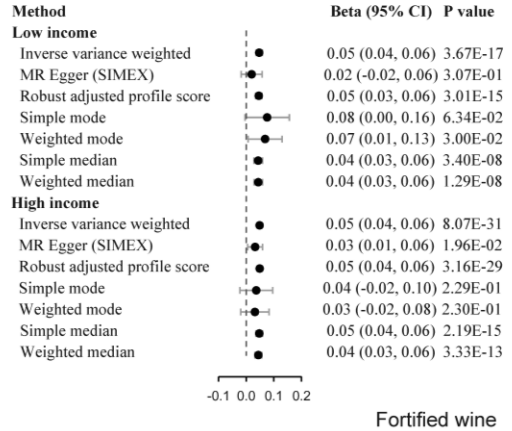

E

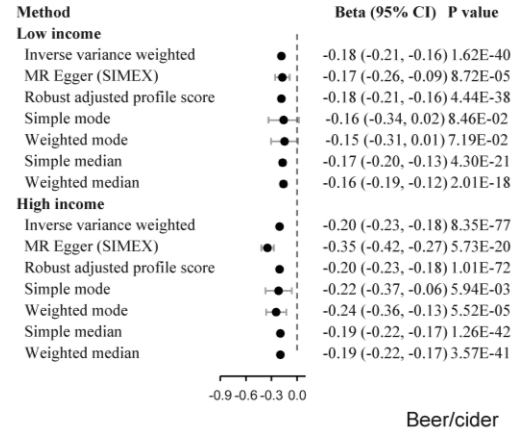

F

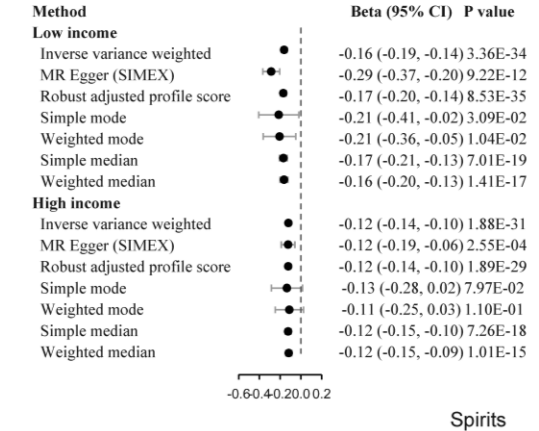

**Supplementary Figure 7** Associations of educational attainment and amount of total and specific alcohol intake from Mendelian Randomization (MR) analyses stratified by income.

Panel A, the total amount of alcohol intake; panel B, red wine; panel C, white wine/champagne; panel D, fortified wine; panel E, beer/cider; panel F, spirits. Income was dichotomized into less than £31 000 and £31 000 or more than £31 000.

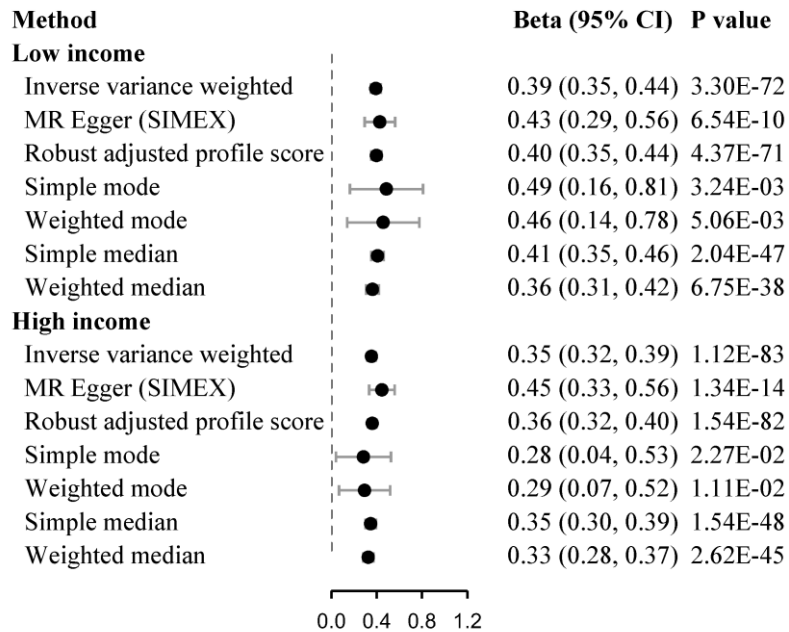

**Supplementary Figure 8** Associations of educational attainment and alcohol intake frequency from Mendelian Randomization (MR) analyses stratified by income. Income was dichotomized into less than £31 000 and £31 000 or more than £31 000.

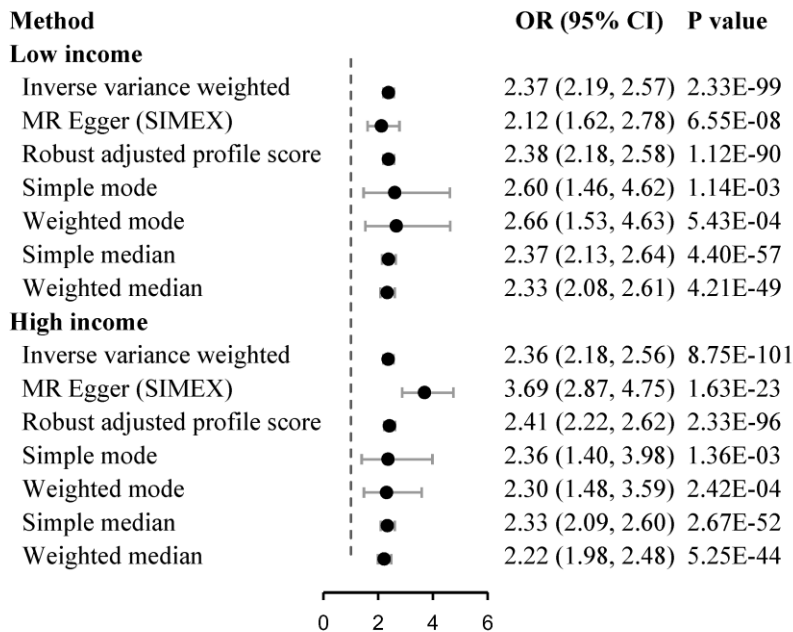

**Supplementary Figure 9** Associations of educational attainment and alcohol taken with meals from Mendelian Randomization (MR) analyses stratified by income. Income was dichotomized into less than £31 000 and £31 000 or more than £31 000.

**Supplementary Table 2** Characteristics of SNPs included as instrument variables in the Mendelian randomization analysis between education attainment and alcohol intake[1]

| SNP         | Chr | Position  | Allele 1 | Allele2 | Frequency Allele 1 | Effect size | SE     | P-value   |
|-------------|-----|-----------|----------|---------|--------------------|-------------|--------|-----------|
| rs9859556   | 3   | 49455986  | T        | G       | 0.3132             | 0.0290      | 0.0015 | 4.610E-82 |
| rs7029718   | 9   | 23358495  | A        | G       | 0.4108             | 0.0244      | 0.0014 | 7.820E-65 |
| rs1334297   | 13  | 58335375  | A        | G       | 0.7375             | 0.0257      | 0.0016 | 2.530E-58 |
| rs9375188   | 6   | 98555272  | T        | C       | 0.4847             | 0.0212      | 0.0014 | 8.780E-52 |
| rs2526398   | 3   | 50187596  | C        | G       | 0.3468             | -0.0222     | 0.0015 | 2.470E-51 |
| rs13018640  | 2   | 100821545 | T        | C       | 0.6017             | -0.0215     | 0.0014 | 1.050E-50 |
| rs34305371  | 1   | 72733610  | A        | G       | 0.0985             | 0.0314      | 0.0024 | 1.100E-39 |
| rs6449503   | 5   | 60095272  | A        | G       | 0.5038             | 0.0185      | 0.0014 | 1.840E-39 |
| rs1689510   | 12  | 56396768  | C        | G       | 0.3315             | 0.0194      | 0.0015 | 1.350E-38 |
| rs11082011  | 18  | 35145122  | T        | C       | 0.6716             | 0.0194      | 0.0015 | 2.060E-38 |
| rs1008078   | 1   | 91189731  | T        | C       | 0.4019             | -0.0182     | 0.0014 | 4.500E-37 |
| rs61104616  | 5   | 88163771  | A        | G       | 0.5249             | -0.0172     | 0.0014 | 1.560E-34 |
| rs12076635  | 1   | 44026656  | C        | G       | 0.7811             | 0.0207      | 0.0017 | 3.330E-34 |
| rs66568921  | 3   | 85672018  | T        | G       | 0.6441             | -0.0181     | 0.0015 | 7.600E-34 |
| rs56319902  | 17  | 43871982  | T        | C       | 0.2155             | -0.0206     | 0.0017 | 5.810E-33 |
| rs73344830  | 10  | 103816828 | A        | G       | 0.4181             | 0.0170      | 0.0014 | 1.000E-32 |
| rs11678980  | 2   | 162101261 | A        | G       | 0.4527             | -0.0166     | 0.0014 | 1.600E-31 |
| rs11588857  | 1   | 204587047 | A        | G       | 0.2131             | 0.0199      | 0.0017 | 4.450E-31 |
| rs10773002  | 12  | 123746961 | A        | T       | 0.2520             | 0.0185      | 0.0016 | 2.500E-30 |
| rs176218    | 14  | 29600506  | T        | G       | 0.1958             | 0.0200      | 0.0018 | 1.100E-29 |
| rs7849487   | 9   | 1757274   | T        | G       | 0.6578             | -0.0167     | 0.0015 | 1.250E-29 |
| rs10189857  | 2   | 60713235  | A        | G       | 0.5654             | 0.0158      | 0.0014 | 4.690E-29 |
| rs4787457   | 16  | 28555400  | A        | G       | 0.6339             | 0.0162      | 0.0015 | 1.230E-28 |
| rs4919624   | 10  | 104021085 | A        | G       | 0.8022             | 0.0193      | 0.0018 | 6.520E-28 |
| rs111226181 | 3   | 49931760  | T        | G       | 0.1773             | -0.0201     | 0.0018 | 1.350E-27 |
| rs35417702  | 7   | 71739916  | T        | C       | 0.5235             | -0.0152     | 0.0014 | 2.400E-27 |
| rs55736314  | 3   | 71586293  | C        | G       | 0.5990             | -0.0154     | 0.0014 | 4.590E-27 |
| rs6452793   | 5   | 87818174  | T        | G       | 0.2340             | 0.0175      | 0.0017 | 4.470E-26 |
| rs10215082  | 7   | 92657985  | A        | G       | 0.4661             | -0.0149     | 0.0014 | 7.030E-26 |
| rs62262671  | 3   | 49649873  | A        | G       | 0.8634             | 0.0213      | 0.0020 | 2.220E-25 |
| rs3897821   | 1   | 243420388 | A        | G       | 0.6654             | 0.0154      | 0.0015 | 3.580E-25 |
| rs6557171   | 6   | 152234593 | T        | C       | 0.3232             | -0.0155     | 0.0015 | 5.480E-25 |
| rs13240401  | 7   | 2194396   | T        | C       | 0.7812             | 0.0176      | 0.0017 | 2.360E-24 |
| rs2568955   | 1   | 72762169  | T        | C       | 0.2481             | -0.0165     | 0.0016 | 2.510E-24 |
| rs324885    | 5   | 87897271  | A        | C       | 0.5257             | 0.0142      | 0.0014 | 4.110E-24 |
| rs363096    | 4   | 3180021   | T        | C       | 0.4245             | -0.0143     | 0.0014 | 5.770E-24 |
| rs76076331  | 2   | 10977585  | T        | C       | 0.1346             | 0.0206      | 0.0021 | 1.710E-23 |
| rs2992037   | 1   | 43949810  | A        | G       | 0.3223             | 0.0149      | 0.0015 | 4.180E-23 |
| rs17411339  | 18  | 50807359  | A        | G       | 0.5612             | 0.0140      | 0.0014 | 5.100E-23 |
| rs7683416   | 4   | 106152984 | T        | C       | 0.4592             | 0.0139      | 0.0014 | 6.050E-23 |
| rs12028010  | 1   | 41764471  | T        | C       | 0.7711             | 0.0164      | 0.0017 | 9.780E-23 |
| rs113520408 | 7   | 128402782 | A        | G       | 0.2756             | 0.0155      | 0.0016 | 1.030E-22 |
| rs12375949  | 9   | 124617900 | T        | C       | 0.4312             | -0.0138     | 0.0014 | 1.610E-22 |
| rs71413877  | 2   | 100924822 | A        | G       | 0.0410             | 0.0351      | 0.0036 | 2.660E-22 |
| rs11157931  | 14  | 23403193  | A        | C       | 0.3924             | -0.0139     | 0.0014 | 3.860E-22 |
| rs9490512   | 6   | 98537993  | A        | G       | 0.4496             | -0.0136     | 0.0014 | 4.000E-22 |
| rs9411331   | 9   | 134883419 | A        | C       | 0.6840             | 0.0145      | 0.0015 | 7.630E-22 |
| rs72819118  | 2   | 100451357 | T        | C       | 0.0942             | -0.0231     | 0.0024 | 8.290E-22 |
| rs660001    | 5   | 113866598 | A        | G       | 0.2113             | -0.0164     | 0.0017 | 1.660E-21 |
| rs7924036   | 10  | 65191645  | T        | G       | 0.5124             | 0.0133      | 0.0014 | 2.550E-21 |
| rs12468040  | 2   | 44854981  | T        | G       | 0.3819             | 0.0137      | 0.0014 | 3.120E-21 |
| rs13010288  | 2   | 51824512  | T        | G       | 0.1288             | 0.0198      | 0.0021 | 3.440E-21 |
| rs4500960   | 2   | 162818621 | T        | C       | 0.4647             | -0.0131     | 0.0014 | 1.040E-20 |
| rs1054442   | 12  | 49389320  | A        | C       | 0.6223             | -0.0136     | 0.0015 | 1.100E-20 |



|             |    |           |   |   |        |         |        |           |
|-------------|----|-----------|---|---|--------|---------|--------|-----------|
| rs746839    | 8  | 142617261 | C | G | 0.6283 | 0.0135  | 0.0015 | 1.190E-20 |
| rs11772232  | 7  | 1856273   | T | C | 0.1691 | 0.0177  | 0.0019 | 1.200E-20 |
| rs4490539   | 5  | 60685757  | A | G | 0.6983 | 0.0142  | 0.0015 | 1.310E-20 |
| rs10810099  | 9  | 14161927  | A | G | 0.2734 | -0.0146 | 0.0016 | 1.910E-20 |
| rs9616947   | 22 | 51151631  | T | C | 0.3818 | -0.0134 | 0.0015 | 3.580E-20 |
| rs7590368   | 2  | 10961474  | T | C | 0.7335 | -0.0146 | 0.0016 | 3.980E-20 |
| rs12506221  | 4  | 67899235  | T | G | 0.4360 | -0.0130 | 0.0014 | 4.230E-20 |
| rs10875121  | 1  | 98417446  | C | G | 0.8361 | 0.0174  | 0.0019 | 4.460E-20 |
| rs12761761  | 10 | 133775375 | T | C | 0.2395 | 0.0153  | 0.0017 | 4.790E-20 |
| rs2725370   | 8  | 30852826  | T | C | 0.3017 | -0.0141 | 0.0015 | 4.960E-20 |
| rs56391344  | 15 | 78006899  | A | G | 0.2526 | 0.0148  | 0.0016 | 7.490E-20 |
| rs72962169  | 11 | 72365669  | T | C | 0.1595 | -0.0174 | 0.0019 | 1.260E-19 |
| rs11675476  | 2  | 193853269 | T | C | 0.5224 | -0.0127 | 0.0014 | 1.370E-19 |
| rs2838006   | 21 | 42653567  | T | C | 0.3597 | 0.0132  | 0.0015 | 1.380E-19 |
| rs72828517  | 6  | 19036035  | T | C | 0.8273 | -0.0168 | 0.0019 | 1.380E-19 |
| rs11774212  | 8  | 145686505 | T | C | 0.5163 | 0.0128  | 0.0014 | 1.400E-19 |
| rs72829857  | 6  | 16966052  | A | G | 0.7610 | -0.0149 | 0.0016 | 1.520E-19 |
| rs2179152   | 6  | 26325888  | T | C | 0.3673 | -0.0131 | 0.0015 | 1.680E-19 |
| rs79265434  | 7  | 24621381  | A | G | 0.8834 | -0.0197 | 0.0022 | 1.980E-19 |
| rs62182994  | 2  | 212599303 | T | C | 0.6894 | 0.0137  | 0.0015 | 2.550E-19 |
| rs7323027   | 13 | 58693790  | A | G | 0.3719 | 0.0130  | 0.0015 | 3.910E-19 |
| rs2290601   | 3  | 108112760 | T | C | 0.7720 | -0.0149 | 0.0017 | 4.490E-19 |
| rs178183    | 14 | 26979412  | T | C | 0.2455 | 0.0145  | 0.0016 | 4.810E-19 |
| rs171697    | 5  | 103956516 | C | G | 0.6712 | 0.0133  | 0.0015 | 4.850E-19 |
| rs112375785 | 6  | 98224217  | A | G | 0.1435 | 0.0184  | 0.0021 | 6.000E-19 |
| rs6065080   | 20 | 59832791  | T | C | 0.3589 | -0.0130 | 0.0015 | 7.490E-19 |
| rs2545795   | 5  | 176887106 | A | C | 0.4437 | 0.0125  | 0.0014 | 1.030E-18 |
| rs4757957   | 11 | 12881398  | C | G | 0.6911 | 0.0133  | 0.0015 | 1.790E-18 |
| rs613872    | 18 | 53210302  | T | G | 0.8285 | -0.0163 | 0.0019 | 1.950E-18 |
| rs13107325  | 4  | 103188709 | T | C | 0.0721 | -0.0239 | 0.0027 | 1.980E-18 |
| rs728054    | 7  | 137072364 | A | G | 0.3561 | -0.0128 | 0.0015 | 2.340E-18 |
| rs57352738  | 7  | 133304694 | A | T | 0.2040 | -0.0152 | 0.0017 | 2.510E-18 |
| rs10460095  | 18 | 22624708  | A | G | 0.5714 | -0.0124 | 0.0014 | 2.610E-18 |
| rs790647    | 10 | 106776484 | A | C | 0.2278 | -0.0145 | 0.0017 | 3.810E-18 |
| rs9349956   | 6  | 14718260  | A | C | 0.8211 | -0.0159 | 0.0018 | 4.890E-18 |
| rs6715849   | 2  | 100306378 | A | G | 0.4401 | -0.0122 | 0.0014 | 6.870E-18 |
| rs575113    | 1  | 110046373 | A | G | 0.2941 | 0.0133  | 0.0015 | 7.520E-18 |
| rs76577427  | 1  | 110761099 | C | G | 0.9006 | 0.0203  | 0.0024 | 7.780E-18 |
| rs9616906   | 22 | 51104680  | A | G | 0.4477 | 0.0122  | 0.0014 | 8.310E-18 |
| rs4719944   | 7  | 3496032   | T | C | 0.5462 | -0.0121 | 0.0014 | 9.250E-18 |
| rs9289300   | 3  | 127144988 | T | C | 0.8412 | -0.0164 | 0.0019 | 1.000E-17 |
| rs72671456  | 14 | 29662737  | A | G | 0.1374 | -0.0174 | 0.0020 | 1.270E-17 |
| rs12643771  | 4  | 140753103 | T | C | 0.3094 | 0.0130  | 0.0015 | 1.320E-17 |
| rs4726070   | 7  | 151328218 | A | G | 0.6021 | 0.0122  | 0.0014 | 1.360E-17 |
| rs362307    | 4  | 3241845   | T | C | 0.0772 | -0.0226 | 0.0027 | 1.550E-17 |
| rs11210400  | 1  | 74490459  | A | C | 0.5380 | 0.0120  | 0.0014 | 1.630E-17 |
| rs17563464  | 5  | 26913774  | A | C | 0.2173 | -0.0147 | 0.0017 | 1.740E-17 |
| rs717996    | 12 | 84133820  | T | C | 0.5986 | -0.0122 | 0.0014 | 1.890E-17 |
| rs7526112   | 1  | 93747683  | T | G | 0.6406 | 0.0124  | 0.0015 | 2.070E-17 |
| rs17502934  | 2  | 50994255  | T | G | 0.1489 | -0.0167 | 0.0020 | 2.120E-17 |
| rs9882532   | 3  | 16865845  | T | C | 0.6368 | 0.0124  | 0.0015 | 2.150E-17 |
| rs6493265   | 15 | 47513253  | T | C | 0.3915 | -0.0122 | 0.0014 | 2.260E-17 |
| rs17489649  | 5  | 109156184 | A | G | 0.6788 | 0.0127  | 0.0015 | 2.770E-17 |
| rs76878669  | 11 | 66092567  | C | G | 0.7609 | 0.0141  | 0.0017 | 3.100E-17 |
| rs10496091  | 2  | 61482261  | A | G | 0.2841 | -0.0131 | 0.0016 | 3.710E-17 |
| rs4467547   | 4  | 21945933  | T | G | 0.4070 | 0.0121  | 0.0014 | 4.880E-17 |
| rs3026996   | 1  | 159167290 | A | C | 0.7606 | 0.0138  | 0.0016 | 5.420E-17 |
| rs72624911  | 3  | 49064576  | T | C | 0.0475 | 0.0282  | 0.0034 | 5.590E-17 |

|             |    |           |   |   |        |         |        |           |
|-------------|----|-----------|---|---|--------|---------|--------|-----------|
| rs9933256   | 16 | 1246748   | A | G | 0.5558 | 0.0119  | 0.0014 | 6.060E-17 |
| rs2923424   | 8  | 42382222  | A | G | 0.6069 | 0.0120  | 0.0014 | 6.310E-17 |
| rs635754    | 1  | 96484940  | A | G | 0.5809 | 0.0119  | 0.0014 | 6.360E-17 |
| rs17428076  | 2  | 172851936 | C | G | 0.7598 | 0.0137  | 0.0016 | 6.410E-17 |
| rs7977614   | 12 | 110115286 | A | G | 0.7143 | -0.0134 | 0.0016 | 6.840E-17 |
| rs77609760  | 2  | 142358950 | A | G | 0.9346 | 0.0236  | 0.0028 | 7.710E-17 |
| rs12591647  | 15 | 65959729  | T | C | 0.8171 | -0.0152 | 0.0018 | 7.780E-17 |
| rs6824567   | 4  | 2883172   | T | C | 0.2827 | 0.0130  | 0.0016 | 8.910E-17 |
| rs12957463  | 18 | 37412228  | A | G | 0.7953 | 0.0146  | 0.0018 | 9.200E-17 |
| rs2496482   | 14 | 99750164  | T | C | 0.4161 | 0.0121  | 0.0015 | 9.200E-17 |
| rs11663602  | 18 | 77578191  | A | C | 0.2761 | -0.0130 | 0.0016 | 9.270E-17 |
| rs75177132  | 19 | 4386911   | T | C | 0.0476 | 0.0298  | 0.0036 | 1.010E-16 |
| rs10899282  | 11 | 76504698  | A | G | 0.2279 | 0.0140  | 0.0017 | 1.050E-16 |
| rs2081652   | 4  | 159862913 | A | T | 0.6610 | 0.0123  | 0.0015 | 1.090E-16 |
| rs7974852   | 12 | 14511679  | A | C | 0.5235 | 0.0117  | 0.0014 | 1.140E-16 |
| rs13318986  | 3  | 82533639  | A | G | 0.3311 | 0.0124  | 0.0015 | 1.170E-16 |
| rs2570497   | 2  | 104441546 | T | C | 0.6367 | -0.0121 | 0.0015 | 1.270E-16 |
| rs17598675  | 4  | 176647637 | T | C | 0.5132 | -0.0116 | 0.0014 | 1.370E-16 |
| rs34155847  | 4  | 3252130   | A | G | 0.2483 | 0.0135  | 0.0016 | 1.430E-16 |
| rs11121177  | 1  | 8445946   | A | G | 0.1785 | 0.0151  | 0.0018 | 1.440E-16 |
| rs34106693  | 2  | 101151830 | C | G | 0.8318 | 0.0159  | 0.0019 | 1.620E-16 |
| rs4984682   | 16 | 740404    | C | G | 0.7674 | -0.0138 | 0.0017 | 1.820E-16 |
| rs6704768   | 2  | 233592501 | A | G | 0.5648 | -0.0116 | 0.0014 | 1.840E-16 |
| rs114468556 | 5  | 92870246  | A | T | 0.0421 | 0.0293  | 0.0036 | 1.990E-16 |
| rs1569092   | 1  | 74858724  | A | G | 0.1520 | 0.0160  | 0.0020 | 2.120E-16 |
| rs2910823   | 5  | 59498175  | T | G | 0.5359 | 0.0115  | 0.0014 | 2.500E-16 |
| rs10984445  | 9  | 121980586 | A | G | 0.4604 | 0.0115  | 0.0014 | 2.580E-16 |
| rs34098770  | 16 | 12237812  | A | G | 0.1520 | -0.0160 | 0.0020 | 2.950E-16 |
| rs6569077   | 6  | 98212409  | T | C | 0.3894 | 0.0118  | 0.0014 | 3.290E-16 |
| rs4984541   | 15 | 96911139  | A | G | 0.7666 | -0.0138 | 0.0017 | 3.400E-16 |
| rs7326331   | 13 | 91615838  | A | G | 0.2761 | -0.0128 | 0.0016 | 3.420E-16 |
| rs62260764  | 3  | 47990500  | C | G | 0.2559 | -0.0132 | 0.0016 | 3.450E-16 |
| rs9655780   | 7  | 104667334 | A | G | 0.8287 | -0.0153 | 0.0019 | 3.700E-16 |
| rs10166286  | 2  | 101128095 | T | C | 0.1730 | 0.0151  | 0.0019 | 3.790E-16 |
| rs12646523  | 4  | 170944698 | T | C | 0.2483 | -0.0132 | 0.0016 | 3.790E-16 |
| rs13163062  | 5  | 106955451 | T | C | 0.4260 | 0.0115  | 0.0014 | 4.430E-16 |
| rs6442126   | 3  | 48525955  | A | T | 0.6593 | -0.0121 | 0.0015 | 4.720E-16 |
| rs11081529  | 18 | 75902735  | T | C | 0.7112 | 0.0126  | 0.0015 | 5.220E-16 |
| rs73581580  | 9  | 140251458 | A | G | 0.1248 | -0.0181 | 0.0022 | 5.780E-16 |
| rs5754753   | 22 | 34296751  | T | C | 0.7178 | -0.0126 | 0.0016 | 6.150E-16 |
| rs1656614   | 15 | 47800513  | C | G | 0.3140 | 0.0122  | 0.0015 | 6.910E-16 |
| rs6690195   | 1  | 96221653  | T | C | 0.4907 | -0.0113 | 0.0014 | 7.890E-16 |
| rs35319653  | 4  | 140903155 | T | C | 0.3433 | 0.0119  | 0.0015 | 8.010E-16 |
| rs115000530 | 3  | 69930625  | A | T | 0.9451 | -0.0250 | 0.0031 | 1.090E-15 |
| rs10979613  | 9  | 111687584 | T | C | 0.6389 | -0.0117 | 0.0015 | 1.250E-15 |
| rs17248751  | 16 | 61579618  | A | G | 0.7827 | -0.0136 | 0.0017 | 1.280E-15 |
| rs2998299   | 14 | 84997363  | T | G | 0.2137 | -0.0136 | 0.0017 | 1.510E-15 |
| rs10041403  | 5  | 67805272  | T | C | 0.8339 | 0.0151  | 0.0019 | 1.550E-15 |
| rs11115056  | 12 | 82258775  | A | G | 0.0995 | 0.0187  | 0.0023 | 1.670E-15 |
| rs62379838  | 5  | 120102028 | T | C | 0.6953 | 0.0121  | 0.0015 | 1.770E-15 |
| rs73961845  | 2  | 144478983 | A | G | 0.6170 | -0.0114 | 0.0014 | 2.520E-15 |
| rs11736863  | 4  | 23729566  | A | G | 0.1895 | 0.0142  | 0.0018 | 2.560E-15 |
| rs3812281   | 7  | 135082751 | T | C | 0.6016 | 0.0113  | 0.0014 | 2.700E-15 |
| rs9556958   | 13 | 99100046  | T | C | 0.5233 | -0.0110 | 0.0014 | 5.960E-15 |
| rs6932108   | 6  | 98713992  | C | G | 0.0798 | -0.0210 | 0.0027 | 6.100E-15 |
| rs11732657  | 4  | 172427073 | A | G | 0.7504 | -0.0126 | 0.0016 | 6.240E-15 |
| rs13422673  | 2  | 155474355 | T | C | 0.4659 | -0.0110 | 0.0014 | 6.480E-15 |
| rs2052285   | 16 | 51188432  | A | G | 0.5959 | 0.0112  | 0.0014 | 7.250E-15 |

|            |    |           |   |   |        |         |        |           |
|------------|----|-----------|---|---|--------|---------|--------|-----------|
| rs27220    | 5  | 59775136  | A | G | 0.3562 | -0.0114 | 0.0015 | 7.520E-15 |
| rs488476   | 11 | 95543715  | C | G | 0.6191 | -0.0113 | 0.0015 | 8.290E-15 |
| rs978807   | 18 | 36898459  | A | G | 0.1885 | 0.0139  | 0.0018 | 9.140E-15 |
| rs28512462 | 16 | 24711806  | C | G | 0.3789 | 0.0112  | 0.0014 | 9.770E-15 |
| rs3895736  | 3  | 48658467  | A | C | 0.1728 | 0.0144  | 0.0019 | 9.920E-15 |
| rs2764684  | 1  | 58537919  | T | C | 0.8266 | 0.0143  | 0.0019 | 9.990E-15 |
| rs10892807 | 11 | 121998254 | T | C | 0.5671 | 0.0109  | 0.0014 | 1.090E-14 |
| rs17669337 | 5  | 92187932  | T | C | 0.4133 | -0.0110 | 0.0014 | 1.100E-14 |
| rs12342546 | 9  | 126329270 | A | G | 0.2441 | -0.0128 | 0.0017 | 1.110E-14 |
| rs61527214 | 16 | 83608599  | A | G | 0.4113 | 0.0110  | 0.0014 | 1.130E-14 |
| rs8024     | 1  | 201845575 | A | C | 0.3294 | -0.0115 | 0.0015 | 1.130E-14 |
| rs7603132  | 2  | 4951548   | A | G | 0.1938 | 0.0137  | 0.0018 | 1.200E-14 |
| rs10940921 | 5  | 30808645  | T | G | 0.4194 | 0.0111  | 0.0014 | 1.310E-14 |
| rs6731373  | 2  | 68503044  | A | G | 0.3390 | -0.0115 | 0.0015 | 1.390E-14 |
| rs350281   | 16 | 12231739  | T | G | 0.6825 | -0.0117 | 0.0015 | 1.410E-14 |
| rs303752   | 18 | 21074255  | A | G | 0.4067 | -0.0110 | 0.0014 | 1.470E-14 |
| rs767943   | 6  | 23446691  | A | C | 0.2690 | -0.0122 | 0.0016 | 1.540E-14 |
| rs9375403  | 6  | 98831636  | C | G | 0.2423 | 0.0126  | 0.0016 | 1.660E-14 |
| rs7254263  | 19 | 30741257  | T | C | 0.2850 | -0.0119 | 0.0016 | 1.840E-14 |
| rs11716398 | 3  | 50699715  | A | G | 0.8663 | 0.0159  | 0.0021 | 1.890E-14 |
| rs803619   | 1  | 44465419  | T | C | 0.1076 | -0.0173 | 0.0023 | 2.190E-14 |
| rs4320563  | 8  | 87769961  | A | G | 0.5093 | 0.0109  | 0.0014 | 2.240E-14 |
| rs11871429 | 17 | 42920929  | A | G | 0.7727 | 0.0128  | 0.0017 | 2.520E-14 |
| rs10761251 | 9  | 96421546  | A | T | 0.6633 | 0.0113  | 0.0015 | 2.520E-14 |
| rs6493275  | 15 | 47676579  | A | T | 0.7885 | 0.0131  | 0.0017 | 2.980E-14 |
| rs1866823  | 8  | 57436577  | A | G | 0.5444 | 0.0107  | 0.0014 | 3.090E-14 |
| rs7575637  | 2  | 145796251 | A | G | 0.4538 | 0.0107  | 0.0014 | 3.430E-14 |
| rs9529146  | 13 | 31785404  | T | C | 0.2282 | 0.0127  | 0.0017 | 3.480E-14 |
| rs35016816 | 16 | 10266115  | T | C | 0.8990 | 0.0176  | 0.0023 | 3.560E-14 |
| rs4848924  | 2  | 124991887 | A | C | 0.7100 | -0.0117 | 0.0015 | 3.560E-14 |
| rs2406253  | 7  | 100077273 | A | G | 0.8053 | 0.0135  | 0.0018 | 3.580E-14 |
| rs9267677  | 6  | 31892641  | T | C | 0.9029 | 0.0180  | 0.0024 | 3.660E-14 |
| rs1747714  | 10 | 11161316  | T | C | 0.5287 | 0.0106  | 0.0014 | 3.820E-14 |
| rs929511   | 7  | 8003017   | T | C | 0.1254 | -0.0160 | 0.0021 | 3.910E-14 |
| rs7108020  | 11 | 131289820 | A | C | 0.6475 | 0.0111  | 0.0015 | 3.910E-14 |
| rs1729412  | 2  | 201083598 | T | C | 0.4224 | -0.0107 | 0.0014 | 4.050E-14 |
| rs10057590 | 5  | 124335247 | A | C | 0.4724 | 0.0106  | 0.0014 | 4.080E-14 |
| rs77702819 | 2  | 101328728 | T | G | 0.0907 | 0.0187  | 0.0025 | 4.170E-14 |
| rs6450476  | 5  | 57771087  | A | G | 0.2929 | -0.0116 | 0.0015 | 4.620E-14 |
| rs12602286 | 17 | 19236954  | T | G | 0.8731 | 0.0160  | 0.0021 | 4.620E-14 |
| rs13163845 | 5  | 3264389   | T | C | 0.8488 | -0.0149 | 0.0020 | 4.660E-14 |
| rs12273435 | 11 | 133825855 | A | G | 0.2070 | -0.0132 | 0.0017 | 4.720E-14 |
| rs77999825 | 7  | 127572977 | A | G | 0.0343 | 0.0294  | 0.0039 | 5.080E-14 |
| rs10798888 | 1  | 32199099  | T | G | 0.1725 | -0.0140 | 0.0019 | 5.150E-14 |
| rs7931563  | 11 | 61446425  | T | G | 0.6214 | -0.0109 | 0.0014 | 5.150E-14 |
| rs1128956  | 4  | 183724005 | T | G | 0.8251 | -0.0140 | 0.0019 | 5.340E-14 |
| rs17565975 | 11 | 111586950 | A | G | 0.5563 | -0.0106 | 0.0014 | 5.540E-14 |
| rs12332731 | 5  | 93033082  | A | T | 0.1882 | 0.0135  | 0.0018 | 5.960E-14 |
| rs12712269 | 2  | 107564115 | T | C | 0.3962 | -0.0107 | 0.0014 | 6.880E-14 |
| rs12170452 | 22 | 40019773  | A | G | 0.4507 | 0.0105  | 0.0014 | 7.780E-14 |
| rs58921703 | 7  | 2322943   | T | C | 0.3698 | 0.0109  | 0.0015 | 7.840E-14 |
| rs1405876  | 7  | 86237581  | T | G | 0.6403 | 0.0109  | 0.0015 | 7.840E-14 |
| rs10515007 | 17 | 50395539  | T | C | 0.1610 | 0.0143  | 0.0019 | 8.070E-14 |
| rs35493937 | 2  | 65571139  | C | G | 0.2305 | 0.0124  | 0.0017 | 9.730E-14 |
| rs11599236 | 10 | 106454672 | T | C | 0.5838 | -0.0106 | 0.0014 | 9.940E-14 |
| rs7972246  | 12 | 27209328  | T | C | 0.3451 | 0.0110  | 0.0015 | 1.010E-13 |
| rs7640424  | 3  | 107820063 | T | C | 0.3063 | 0.0113  | 0.0015 | 1.020E-13 |
| rs11620355 | 13 | 92044587  | A | G | 0.0912 | 0.0182  | 0.0025 | 1.090E-13 |

|             |    |           |   |   |        |         |        |           |
|-------------|----|-----------|---|---|--------|---------|--------|-----------|
| rs4396896   | 3  | 86261800  | A | T | 0.3916 | -0.0107 | 0.0014 | 1.120E-13 |
| rs401526    | 8  | 130929166 | T | C | 0.5258 | -0.0104 | 0.0014 | 1.150E-13 |
| rs12478156  | 2  | 164379658 | T | C | 0.6378 | 0.0108  | 0.0015 | 1.240E-13 |
| rs2287838   | 19 | 9959014   | A | G | 0.5504 | -0.0104 | 0.0014 | 1.270E-13 |
| rs6697584   | 1  | 181509718 | T | C | 0.7852 | -0.0126 | 0.0017 | 1.430E-13 |
| rs12571549  | 10 | 111770013 | A | G | 0.1368 | 0.0151  | 0.0020 | 1.450E-13 |
| rs141729694 | 5  | 87999371  | T | C | 0.0768 | 0.0195  | 0.0026 | 1.490E-13 |
| rs1464297   | 2  | 140653749 | T | C | 0.6490 | -0.0109 | 0.0015 | 1.490E-13 |
| rs118134876 | 7  | 11500372  | T | C | 0.0578 | -0.0223 | 0.0030 | 1.500E-13 |
| rs17551064  | 7  | 49869771  | A | G | 0.8378 | 0.0141  | 0.0019 | 1.530E-13 |
| rs1490612   | 4  | 106410855 | T | G | 0.0780 | 0.0193  | 0.0026 | 1.550E-13 |
| rs9853928   | 3  | 103295384 | T | C | 0.2102 | -0.0127 | 0.0017 | 1.590E-13 |
| rs4500930   | 2  | 228985505 | T | C | 0.3449 | -0.0109 | 0.0015 | 1.670E-13 |
| rs4352658   | 6  | 88279872  | T | C | 0.0810 | -0.0190 | 0.0026 | 1.710E-13 |
| rs12875339  | 13 | 55722033  | A | C | 0.6449 | -0.0108 | 0.0015 | 1.710E-13 |
| rs10060023  | 5  | 124304677 | T | C | 0.3276 | 0.0110  | 0.0015 | 1.880E-13 |
| rs34720381  | 1  | 171455322 | T | C | 0.0907 | -0.0180 | 0.0024 | 1.900E-13 |
| rs7460106   | 8  | 143534777 | T | C | 0.7620 | -0.0123 | 0.0017 | 2.060E-13 |
| rs10805383  | 5  | 63034606  | A | G | 0.4879 | -0.0103 | 0.0014 | 2.220E-13 |
| rs61997667  | 14 | 57280046  | T | C | 0.1511 | -0.0144 | 0.0020 | 2.240E-13 |
| rs55986781  | 2  | 60655551  | T | C | 0.0823 | 0.0187  | 0.0026 | 2.270E-13 |
| rs11657342  | 17 | 79355294  | A | G | 0.3670 | 0.0140  | 0.0019 | 2.320E-13 |
| rs2256965   | 6  | 31555130  | A | G | 0.4188 | 0.0106  | 0.0014 | 2.400E-13 |
| rs11542663  | 6  | 119215402 | A | C | 0.6947 | 0.0112  | 0.0015 | 2.440E-13 |
| rs144336753 | 8  | 143356114 | A | G | 0.0181 | 0.0388  | 0.0053 | 2.560E-13 |
| rs12145078  | 1  | 197822977 | A | T | 0.2074 | -0.0127 | 0.0017 | 2.560E-13 |
| rs4426420   | 18 | 35104386  | T | C | 0.1600 | -0.0140 | 0.0019 | 2.630E-13 |
| rs17048801  | 4  | 137529847 | A | T | 0.3909 | -0.0106 | 0.0014 | 2.750E-13 |
| rs1120924   | 4  | 5228939   | T | C | 0.3362 | 0.0108  | 0.0015 | 2.790E-13 |
| rs2364544   | 1  | 41833162  | A | G | 0.3912 | -0.0105 | 0.0014 | 2.910E-13 |
| rs1167827   | 7  | 75163169  | A | G | 0.4347 | 0.0104  | 0.0014 | 2.930E-13 |
| rs28735993  | 22 | 51135595  | A | T | 0.8844 | 0.0162  | 0.0022 | 3.030E-13 |
| rs56099375  | 8  | 77372988  | T | C | 0.2410 | 0.0120  | 0.0017 | 3.100E-13 |
| rs17048855  | 3  | 8258174   | A | G | 0.3426 | 0.0108  | 0.0015 | 3.100E-13 |
| rs479018    | 11 | 66060546  | A | G | 0.3255 | 0.0109  | 0.0015 | 3.100E-13 |
| rs585557    | 11 | 65663547  | A | G | 0.8014 | 0.0128  | 0.0018 | 3.250E-13 |
| rs10951590  | 7  | 39091043  | T | C | 0.3275 | -0.0109 | 0.0015 | 3.620E-13 |
| rs77702622  | 8  | 143367857 | A | G | 0.0614 | -0.0213 | 0.0029 | 3.620E-13 |
| rs72771860  | 5  | 87974682  | T | G | 0.0686 | -0.0211 | 0.0029 | 3.640E-13 |
| rs34748029  | 2  | 104060003 | A | C | 0.0876 | 0.0185  | 0.0025 | 3.720E-13 |
| rs61755388  | 7  | 126541317 | T | C | 0.7878 | 0.0125  | 0.0017 | 3.880E-13 |
| rs12503522  | 4  | 94543233  | T | C | 0.2820 | -0.0113 | 0.0016 | 3.930E-13 |
| rs9886703   | 9  | 82246351  | A | T | 0.1671 | -0.0136 | 0.0019 | 4.460E-13 |
| rs72482130  | 2  | 237054356 | T | C | 0.8464 | 0.0141  | 0.0019 | 4.590E-13 |
| rs77025239  | 3  | 180734185 | A | G | 0.1559 | -0.0140 | 0.0019 | 4.650E-13 |
| rs2014830   | 3  | 50172397  | T | C | 0.3139 | 0.0110  | 0.0015 | 4.720E-13 |
| rs111852224 | 18 | 25596884  | T | C | 0.1227 | 0.0156  | 0.0022 | 4.850E-13 |
| rs4384309   | 10 | 133110596 | A | G | 0.4641 | 0.0102  | 0.0014 | 4.890E-13 |
| rs7560871   | 2  | 145616899 | A | G | 0.0739 | -0.0193 | 0.0027 | 5.240E-13 |
| rs12524795  | 6  | 3464074   | T | C | 0.4374 | 0.0102  | 0.0014 | 5.280E-13 |
| rs72622559  | 3  | 175672897 | T | C | 0.2301 | -0.0120 | 0.0017 | 5.500E-13 |
| rs9386110   | 6  | 145626208 | T | C | 0.8917 | -0.0163 | 0.0023 | 5.660E-13 |
| rs62179650  | 2  | 189135884 | A | G | 0.2995 | 0.0112  | 0.0016 | 5.660E-13 |
| rs6065784   | 20 | 43717435  | C | G | 0.6953 | 0.0110  | 0.0015 | 5.780E-13 |
| rs4673840   | 2  | 215363241 | T | C | 0.8420 | -0.0138 | 0.0019 | 5.860E-13 |
| rs56085180  | 7  | 2143594   | A | G | 0.0366 | -0.0269 | 0.0037 | 5.940E-13 |
| rs2043187   | 18 | 50394405  | A | G | 0.3840 | 0.0107  | 0.0015 | 5.940E-13 |
| rs1329044   | 9  | 23747791  | T | C | 0.8276 | 0.0134  | 0.0019 | 6.280E-13 |

|             |    |           |   |   |        |         |        |           |
|-------------|----|-----------|---|---|--------|---------|--------|-----------|
| rs12750688  | 1  | 98757620  | C | G | 0.7406 | 0.0116  | 0.0016 | 6.640E-13 |
| rs3809634   | 16 | 53538157  | A | G | 0.6842 | -0.0109 | 0.0015 | 6.820E-13 |
| rs62177359  | 2  | 161290337 | A | C | 0.9653 | -0.0275 | 0.0038 | 6.870E-13 |
| rs75203411  | 2  | 100513153 | T | C | 0.1713 | 0.0135  | 0.0019 | 7.680E-13 |
| rs4899012   | 14 | 61003889  | C | G | 0.6019 | -0.0103 | 0.0014 | 8.060E-13 |
| rs11100237  | 4  | 160477041 | A | G | 0.5242 | -0.0101 | 0.0014 | 8.170E-13 |
| rs4358358   | 4  | 30970822  | A | G | 0.6937 | 0.0109  | 0.0015 | 8.690E-13 |
| rs12774577  | 10 | 104959487 | T | C | 0.8545 | 0.0142  | 0.0020 | 8.690E-13 |
| rs74545339  | 8  | 135440608 | A | G | 0.1142 | -0.0158 | 0.0022 | 9.060E-13 |
| rs7430651   | 3  | 116582186 | T | C | 0.2863 | -0.0111 | 0.0016 | 9.380E-13 |
| rs730384    | 14 | 74889870  | A | G | 0.4388 | 0.0101  | 0.0014 | 9.380E-13 |
| rs34067381  | 3  | 123594419 | T | G | 0.3617 | -0.0104 | 0.0015 | 9.770E-13 |
| rs969512    | 4  | 147872742 | A | T | 0.6596 | -0.0106 | 0.0015 | 9.840E-13 |
| rs4497562   | 13 | 62612604  | A | G | 0.7295 | 0.0112  | 0.0016 | 1.050E-12 |
| rs6994287   | 8  | 9340932   | A | G | 0.4055 | 0.0102  | 0.0014 | 1.110E-12 |
| rs9888796   | 16 | 68297589  | T | C | 0.2625 | 0.0113  | 0.0016 | 1.200E-12 |
| rs11021432  | 11 | 95837674  | A | T | 0.3692 | 0.0103  | 0.0015 | 1.250E-12 |
| rs11703948  | 22 | 38817047  | A | G | 0.9026 | -0.0168 | 0.0024 | 1.260E-12 |
| rs12682775  | 9  | 135490491 | T | C | 0.7754 | -0.0119 | 0.0017 | 1.260E-12 |
| rs165633    | 22 | 29880773  | A | G | 0.7575 | -0.0116 | 0.0016 | 1.270E-12 |
| rs10752262  | 10 | 12395100  | T | C | 0.4192 | 0.0102  | 0.0014 | 1.280E-12 |
| rs981230    | 5  | 59039858  | T | C | 0.4793 | 0.0100  | 0.0014 | 1.280E-12 |
| rs77201694  | 1  | 44347087  | A | G | 0.1213 | 0.0156  | 0.0022 | 1.280E-12 |
| rs56405138  | 4  | 166126745 | A | T | 0.1231 | 0.0153  | 0.0022 | 1.310E-12 |
| rs72636697  | 4  | 68016609  | T | C | 0.1551 | -0.0140 | 0.0020 | 1.310E-12 |
| rs62340636  | 4  | 176940335 | T | G | 0.6254 | 0.0103  | 0.0014 | 1.470E-12 |
| rs995698    | 9  | 87997869  | A | G | 0.5380 | -0.0099 | 0.0014 | 1.530E-12 |
| rs62155873  | 2  | 105969362 | T | C | 0.1221 | -0.0151 | 0.0021 | 1.650E-12 |
| rs114593137 | 1  | 241876565 | A | T | 0.7930 | -0.0122 | 0.0017 | 1.650E-12 |
| rs35929923  | 7  | 21400525  | A | G | 0.2495 | -0.0114 | 0.0016 | 1.770E-12 |
| rs10204051  | 2  | 103775435 | T | G | 0.4055 | -0.0101 | 0.0014 | 1.920E-12 |
| rs73648455  | 9  | 14077378  | T | C | 0.0797 | -0.0183 | 0.0026 | 1.990E-12 |
| rs192436652 | 19 | 54960747  | T | C | 0.0268 | -0.0319 | 0.0045 | 2.060E-12 |
| rs175325    | 20 | 22317310  | A | T | 0.5966 | -0.0100 | 0.0014 | 2.240E-12 |
| rs60096640  | 6  | 27636313  | A | G | 0.8926 | 0.0159  | 0.0023 | 2.240E-12 |
| rs12405889  | 1  | 235597252 | T | G | 0.4890 | -0.0098 | 0.0014 | 2.300E-12 |
| rs9929556   | 16 | 62193640  | T | G | 0.5688 | -0.0099 | 0.0014 | 2.310E-12 |
| rs17604349  | 16 | 72210865  | A | G | 0.1852 | 0.0127  | 0.0018 | 2.360E-12 |
| rs2216144   | 12 | 97666478  | T | C | 0.5306 | 0.0098  | 0.0014 | 2.580E-12 |
| rs56174996  | 1  | 91145181  | A | G | 0.1359 | -0.0143 | 0.0020 | 2.810E-12 |
| rs13197257  | 6  | 128333682 | T | G | 0.2790 | 0.0109  | 0.0016 | 2.830E-12 |
| rs4846724   | 1  | 221967817 | A | G | 0.5347 | 0.0098  | 0.0014 | 2.890E-12 |
| rs356999    | 2  | 60811584  | A | G | 0.3802 | -0.0101 | 0.0014 | 2.910E-12 |
| rs72677177  | 1  | 72120034  | A | G | 0.4017 | 0.0100  | 0.0014 | 3.030E-12 |
| rs6573559   | 14 | 64923166  | T | G | 0.3152 | 0.0105  | 0.0015 | 3.110E-12 |
| rs12638072  | 3  | 65654480  | A | G | 0.2992 | -0.0107 | 0.0015 | 3.130E-12 |
| rs9929993   | 16 | 7664875   | T | C | 0.3610 | -0.0102 | 0.0015 | 3.180E-12 |
| rs79798166  | 5  | 59152140  | A | G | 0.0884 | 0.0172  | 0.0025 | 3.630E-12 |
| rs3735478   | 7  | 44800176  | T | G | 0.2932 | 0.0108  | 0.0016 | 3.660E-12 |
| rs77719387  | 3  | 49917021  | A | T | 0.0174 | -0.0403 | 0.0058 | 3.780E-12 |
| rs118093058 | 11 | 62413673  | T | G | 0.1330 | 0.0146  | 0.0021 | 3.780E-12 |
| rs59480703  | 8  | 9653130   | C | G | 0.1936 | -0.0123 | 0.0018 | 3.970E-12 |
| rs4881269   | 10 | 4031519   | A | G | 0.3818 | 0.0100  | 0.0014 | 3.970E-12 |
| rs8008382   | 14 | 104054425 | T | C | 0.3009 | -0.0106 | 0.0015 | 4.070E-12 |
| rs7617204   | 3  | 160821969 | A | G | 0.5223 | -0.0097 | 0.0014 | 4.330E-12 |
| rs1117152   | 12 | 15438032  | T | G | 0.7010 | 0.0106  | 0.0015 | 4.470E-12 |
| rs7041702   | 9  | 33053430  | A | G | 0.7406 | -0.0111 | 0.0016 | 4.530E-12 |
| rs1434630   | 5  | 136557055 | T | G | 0.1479 | -0.0137 | 0.0020 | 4.630E-12 |

|             |    |           |   |   |        |         |        |           |
|-------------|----|-----------|---|---|--------|---------|--------|-----------|
| rs4839155   | 1  | 112161489 | T | G | 0.7671 | 0.0115  | 0.0017 | 4.660E-12 |
| rs11687736  | 2  | 225405122 | A | T | 0.6764 | -0.0105 | 0.0015 | 4.660E-12 |
| rs10145520  | 14 | 21930932  | T | G | 0.8031 | -0.0122 | 0.0018 | 4.780E-12 |
| rs711793    | 2  | 174175921 | T | C | 0.3474 | 0.0103  | 0.0015 | 5.010E-12 |
| rs7910403   | 10 | 87039251  | T | G | 0.1952 | 0.0122  | 0.0018 | 5.080E-12 |
| rs12285074  | 11 | 116762028 | A | G | 0.1012 | 0.0161  | 0.0023 | 5.110E-12 |
| rs9267658   | 6  | 31845985  | T | C | 0.1428 | 0.0138  | 0.0020 | 5.250E-12 |
| rs35811586  | 2  | 233743794 | T | C | 0.0547 | 0.0217  | 0.0031 | 5.470E-12 |
| rs9373363   | 6  | 143150043 | A | G | 0.7485 | -0.0111 | 0.0016 | 5.540E-12 |
| rs721579    | 17 | 43370481  | T | C | 0.2617 | -0.0110 | 0.0016 | 5.960E-12 |
| rs12764593  | 10 | 107491895 | C | G | 0.0622 | 0.0202  | 0.0029 | 6.000E-12 |
| rs62420387  | 6  | 98404243  | T | C | 0.0750 | -0.0184 | 0.0027 | 6.160E-12 |
| rs74415461  | 16 | 89990843  | T | C | 0.0843 | 0.0176  | 0.0026 | 6.250E-12 |
| rs74747621  | 2  | 229061868 | T | C | 0.1124 | 0.0153  | 0.0022 | 6.290E-12 |
| rs7147473   | 14 | 30608538  | A | G | 0.6719 | -0.0103 | 0.0015 | 6.330E-12 |
| rs74091672  | 1  | 73978572  | A | C | 0.8881 | -0.0153 | 0.0022 | 6.460E-12 |
| rs77554090  | 3  | 65711935  | T | C | 0.0731 | -0.0186 | 0.0027 | 6.630E-12 |
| rs981883    | 5  | 57107989  | A | G | 0.3886 | 0.0099  | 0.0014 | 6.670E-12 |
| rs35104491  | 6  | 97390463  | A | G | 0.1849 | 0.0124  | 0.0018 | 6.810E-12 |
| rs10937240  | 3  | 185802823 | T | C | 0.1899 | -0.0123 | 0.0018 | 6.950E-12 |
| rs56171318  | 18 | 35272539  | T | C | 0.1431 | -0.0137 | 0.0020 | 7.090E-12 |
| rs1637770   | 7  | 2190385   | T | C | 0.0683 | 0.0191  | 0.0028 | 7.320E-12 |
| rs13133213  | 4  | 15646794  | A | G | 0.4980 | 0.0096  | 0.0014 | 7.570E-12 |
| rs6715321   | 2  | 100109001 | T | C | 0.4277 | -0.0097 | 0.0014 | 7.620E-12 |
| rs7317761   | 13 | 100753796 | C | G | 0.7355 | 0.0109  | 0.0016 | 7.770E-12 |
| rs10773208  | 12 | 122970156 | T | C | 0.2526 | -0.0110 | 0.0016 | 8.090E-12 |
| rs4741571   | 9  | 1667814   | A | G | 0.6723 | -0.0102 | 0.0015 | 8.090E-12 |
| rs6917204   | 6  | 145284716 | T | C | 0.7951 | 0.0119  | 0.0017 | 8.140E-12 |
| rs6743032   | 2  | 126024787 | A | G | 0.0926 | -0.0165 | 0.0024 | 8.360E-12 |
| rs17190418  | 13 | 58746132  | T | C | 0.0537 | -0.0213 | 0.0031 | 8.420E-12 |
| rs13145650  | 4  | 122963344 | T | C | 0.9170 | -0.0173 | 0.0025 | 8.990E-12 |
| rs1671770   | 12 | 120946568 | A | C | 0.1786 | 0.0125  | 0.0018 | 9.230E-12 |
| rs117005905 | 6  | 114218608 | T | C | 0.1143 | 0.0150  | 0.0022 | 9.350E-12 |
| rs12888615  | 14 | 72435705  | T | C | 0.1991 | 0.0120  | 0.0018 | 9.420E-12 |
| rs1842713   | 17 | 33200385  | A | G | 0.7882 | -0.0117 | 0.0017 | 9.670E-12 |
| rs3859523   | 19 | 32972296  | T | C | 0.8208 | 0.0124  | 0.0018 | 9.920E-12 |
| rs1335482   | 1  | 78603463  | T | C | 0.5295 | 0.0096  | 0.0014 | 1.010E-11 |
| rs9929762   | 16 | 78169675  | A | G | 0.5595 | 0.0096  | 0.0014 | 1.030E-11 |
| rs2283076   | 7  | 126478190 | A | G | 0.7786 | 0.0115  | 0.0017 | 1.050E-11 |
| rs62142891  | 2  | 51539113  | A | G | 0.2632 | 0.0108  | 0.0016 | 1.050E-11 |
| rs7625428   | 3  | 56570907  | T | C | 0.6036 | 0.0098  | 0.0014 | 1.070E-11 |
| rs4298514   | 8  | 118932887 | T | C | 0.6986 | 0.0104  | 0.0015 | 1.070E-11 |
| rs13099165  | 3  | 168740425 | T | G | 0.2029 | -0.0118 | 0.0017 | 1.090E-11 |
| rs2447097   | 17 | 2278064   | T | G | 0.4596 | 0.0096  | 0.0014 | 1.100E-11 |
| rs117799466 | 15 | 34659517  | C | G | 0.3619 | 0.0106  | 0.0016 | 1.190E-11 |
| rs4358081   | 2  | 29100642  | A | C | 0.5285 | -0.0095 | 0.0014 | 1.280E-11 |
| rs12967010  | 18 | 9645035   | T | C | 0.7746 | 0.0114  | 0.0017 | 1.330E-11 |
| rs75033012  | 11 | 61347033  | C | G | 0.0391 | -0.0258 | 0.0038 | 1.380E-11 |
| rs1426619   | 10 | 90091540  | T | C | 0.4346 | 0.0096  | 0.0014 | 1.400E-11 |
| rs7928017   | 11 | 113448762 | A | C | 0.4341 | 0.0096  | 0.0014 | 1.430E-11 |
| rs6534338   | 4  | 123026869 | T | C | 0.3034 | 0.0103  | 0.0015 | 1.460E-11 |
| rs11732160  | 4  | 67070824  | A | G | 0.7154 | 0.0105  | 0.0016 | 1.460E-11 |
| rs137858393 | 1  | 96454977  | A | G | 0.9341 | 0.0193  | 0.0029 | 1.550E-11 |
| rs2761438   | 1  | 110752139 | A | G | 0.3807 | 0.0098  | 0.0015 | 1.590E-11 |
| rs17742342  | 2  | 148633936 | A | C | 0.8020 | -0.0119 | 0.0018 | 1.590E-11 |
| rs2470966   | 7  | 104430889 | C | G | 0.6998 | -0.0103 | 0.0015 | 1.620E-11 |
| rs7167688   | 15 | 26813137  | T | C | 0.4917 | -0.0094 | 0.0014 | 1.710E-11 |
| rs401966    | 7  | 101695817 | C | G | 0.3900 | -0.0097 | 0.0014 | 1.720E-11 |

|             |    |           |   |   |        |         |        |           |
|-------------|----|-----------|---|---|--------|---------|--------|-----------|
| rs7803932   | 7  | 70203673  | A | G | 0.1667 | 0.0127  | 0.0019 | 1.740E-11 |
| rs3751331   | 12 | 58290278  | A | G | 0.3797 | -0.0097 | 0.0014 | 1.750E-11 |
| rs12453682  | 17 | 37770005  | T | C | 0.6947 | 0.0102  | 0.0015 | 1.810E-11 |
| rs2220926   | 18 | 58943386  | T | C | 0.4308 | -0.0095 | 0.0014 | 1.840E-11 |
| rs4469771   | 10 | 68192714  | T | C | 0.6802 | 0.0101  | 0.0015 | 1.880E-11 |
| rs1792602   | 11 | 90439633  | A | G | 0.3824 | -0.0097 | 0.0014 | 1.900E-11 |
| rs482787    | 10 | 99767024  | T | C | 0.6749 | 0.0100  | 0.0015 | 1.950E-11 |
| rs34780702  | 1  | 197907554 | A | G | 0.7635 | 0.0111  | 0.0017 | 2.050E-11 |
| rs79728014  | 11 | 46062245  | A | G | 0.8553 | -0.0134 | 0.0020 | 2.060E-11 |
| rs9536462   | 13 | 54124650  | A | G | 0.1454 | 0.0133  | 0.0020 | 2.100E-11 |
| rs12694681  | 2  | 226609241 | T | G | 0.6883 | 0.0102  | 0.0015 | 2.130E-11 |
| rs341504    | 13 | 60421219  | A | T | 0.3620 | 0.0099  | 0.0015 | 2.220E-11 |
| rs140711597 | 3  | 48469441  | C | G | 0.9818 | 0.0366  | 0.0055 | 2.230E-11 |
| rs7016302   | 8  | 4833041   | C | G | 0.8308 | -0.0125 | 0.0019 | 2.260E-11 |
| rs11652522  | 17 | 43055579  | A | C | 0.1045 | -0.0154 | 0.0023 | 2.290E-11 |
| rs11138947  | 9  | 72110562  | T | C | 0.7236 | 0.0105  | 0.0016 | 2.360E-11 |
| rs7597126   | 2  | 215009358 | T | C | 0.4915 | -0.0094 | 0.0014 | 2.460E-11 |
| rs590013    | 1  | 29155738  | T | C | 0.6772 | 0.0100  | 0.0015 | 2.470E-11 |
| rs4766424   | 12 | 1954096   | C | G | 0.1237 | 0.0142  | 0.0021 | 2.470E-11 |
| rs312927    | 19 | 3274770   | A | G | 0.1203 | -0.0147 | 0.0022 | 2.520E-11 |
| rs2160514   | 12 | 16756508  | A | C | 0.5548 | -0.0094 | 0.0014 | 2.540E-11 |
| rs1035578   | 16 | 12531365  | A | G | 0.5272 | -0.0094 | 0.0014 | 2.570E-11 |
| rs76077165  | 2  | 162893338 | A | C | 0.0898 | 0.0165  | 0.0025 | 2.620E-11 |
| rs2529069   | 7  | 24571038  | T | C | 0.7343 | -0.0106 | 0.0016 | 2.660E-11 |
| rs78193153  | 7  | 71720681  | A | G | 0.0647 | 0.0191  | 0.0029 | 2.760E-11 |
| rs58859557  | 1  | 44010456  | T | C | 0.0702 | 0.0187  | 0.0028 | 2.820E-11 |
| rs62109862  | 19 | 13011809  | A | G | 0.1418 | 0.0136  | 0.0020 | 2.850E-11 |
| rs5754762   | 22 | 34329224  | A | G | 0.9405 | 0.0197  | 0.0030 | 2.950E-11 |
| rs4328757   | 3  | 36938180  | T | C | 0.6119 | 0.0096  | 0.0014 | 2.950E-11 |
| rs7127580   | 11 | 79144856  | C | G | 0.8925 | -0.0150 | 0.0023 | 3.120E-11 |
| rs6123924   | 20 | 58219764  | A | G | 0.8445 | 0.0129  | 0.0019 | 3.200E-11 |
| rs12790196  | 11 | 57497847  | T | C | 0.3263 | -0.0101 | 0.0015 | 3.290E-11 |
| rs34807077  | 8  | 28680769  | A | C | 0.1569 | 0.0128  | 0.0019 | 3.290E-11 |
| rs9527662   | 13 | 58020265  | A | T | 0.4193 | 0.0094  | 0.0014 | 3.370E-11 |
| rs2852349   | 18 | 37182907  | T | C | 0.5278 | -0.0093 | 0.0014 | 3.780E-11 |
| rs9545395   | 13 | 36370970  | T | C | 0.8702 | 0.0138  | 0.0021 | 3.810E-11 |
| rs12151248  | 19 | 13212025  | T | C | 0.1141 | -0.0149 | 0.0023 | 3.810E-11 |
| rs35606437  | 8  | 93327532  | A | G | 0.2675 | 0.0105  | 0.0016 | 3.980E-11 |
| rs1865955   | 10 | 118837990 | T | C | 0.8244 | 0.0122  | 0.0019 | 4.060E-11 |
| rs9527905   | 13 | 59403033  | A | G | 0.5828 | -0.0094 | 0.0014 | 4.110E-11 |
| rs4652135   | 1  | 175837673 | A | C | 0.7201 | 0.0103  | 0.0016 | 4.350E-11 |
| rs74944275  | 5  | 102726073 | T | C | 0.0433 | 0.0231  | 0.0035 | 4.440E-11 |
| rs114952970 | 2  | 161812352 | T | C | 0.0325 | 0.0265  | 0.0040 | 4.440E-11 |
| rs13327482  | 3  | 196788363 | A | G | 0.8221 | -0.0121 | 0.0018 | 4.470E-11 |
| rs4675248   | 2  | 202880230 | A | G | 0.3995 | -0.0094 | 0.0014 | 4.500E-11 |
| rs2964199   | 5  | 57532775  | T | C | 0.3149 | -0.0099 | 0.0015 | 4.610E-11 |
| rs9830359   | 3  | 85397118  | T | C | 0.1117 | -0.0147 | 0.0022 | 4.700E-11 |
| rs12126231  | 1  | 184698816 | A | G | 0.6094 | 0.0095  | 0.0014 | 4.820E-11 |
| rs6812533   | 4  | 39687838  | T | C | 0.7444 | 0.0106  | 0.0016 | 4.850E-11 |
| rs4778058   | 15 | 93456069  | T | C | 0.4964 | -0.0092 | 0.0014 | 4.920E-11 |
| rs1171040   | 1  | 190400984 | A | G | 0.7866 | -0.0113 | 0.0017 | 5.070E-11 |
| rs6924023   | 6  | 170076041 | A | G | 0.7548 | 0.0107  | 0.0016 | 5.170E-11 |
| rs7799141   | 7  | 132660489 | A | G | 0.3104 | 0.0099  | 0.0015 | 5.310E-11 |
| rs10830858  | 11 | 91896638  | T | C | 0.5104 | 0.0092  | 0.0014 | 5.310E-11 |
| rs4895650   | 6  | 145024122 | T | C | 0.5472 | 0.0093  | 0.0014 | 5.310E-11 |
| rs13015496  | 2  | 226290705 | C | G | 0.1842 | 0.0119  | 0.0018 | 5.340E-11 |
| rs67456868  | 6  | 119079800 | A | G | 0.1839 | 0.0119  | 0.0018 | 5.370E-11 |
| rs11623285  | 14 | 24557642  | T | G | 0.8630 | -0.0135 | 0.0021 | 5.580E-11 |

|             |    |           |   |   |        |         |        |           |
|-------------|----|-----------|---|---|--------|---------|--------|-----------|
| rs4369924   | 20 | 41954383  | A | G | 0.1615 | 0.0125  | 0.0019 | 5.580E-11 |
| rs10783243  | 12 | 48653003  | A | G | 0.5228 | -0.0092 | 0.0014 | 5.800E-11 |
| rs9771228   | 7  | 32322496  | T | C | 0.6491 | 0.0096  | 0.0015 | 5.910E-11 |
| rs12670376  | 7  | 48823154  | A | G | 0.4464 | 0.0092  | 0.0014 | 5.990E-11 |
| rs9927842   | 16 | 15153717  | T | C | 0.1490 | -0.0130 | 0.0020 | 6.220E-11 |
| rs1991585   | 2  | 16647170  | T | C | 0.7060 | -0.0101 | 0.0015 | 6.260E-11 |
| rs252991    | 5  | 106767346 | A | G | 0.3695 | 0.0095  | 0.0015 | 6.300E-11 |
| rs12789313  | 11 | 25058937  | T | C | 0.4907 | 0.0092  | 0.0014 | 6.790E-11 |
| rs11158800  | 14 | 69747046  | A | G | 0.5044 | -0.0091 | 0.0014 | 7.150E-11 |
| rs12477385  | 2  | 166144850 | T | G | 0.2264 | 0.0109  | 0.0017 | 7.150E-11 |
| rs67224963  | 5  | 63787810  | A | G | 0.2052 | 0.0113  | 0.0017 | 7.190E-11 |
| rs913509    | 9  | 134737751 | A | G | 0.6560 | 0.0096  | 0.0015 | 7.420E-11 |
| rs939400    | 2  | 50645890  | T | G | 0.3685 | -0.0095 | 0.0015 | 7.520E-11 |
| rs139244147 | 7  | 111912738 | A | G | 0.0604 | -0.0193 | 0.0030 | 7.710E-11 |
| rs4851263   | 2  | 100801867 | A | G | 0.1030 | -0.0151 | 0.0023 | 7.860E-11 |
| rs743316    | 21 | 35252696  | T | C | 0.7915 | 0.0112  | 0.0017 | 8.210E-11 |
| rs7321274   | 13 | 69146186  | A | G | 0.7999 | 0.0114  | 0.0018 | 8.210E-11 |
| rs1329125   | 1  | 234740880 | T | C | 0.3273 | -0.0097 | 0.0015 | 8.370E-11 |
| rs118040169 | 19 | 13109531  | A | G | 0.9650 | -0.0248 | 0.0038 | 8.470E-11 |
| rs13246220  | 7  | 39324253  | T | G | 0.6117 | -0.0093 | 0.0014 | 8.530E-11 |
| rs4941735   | 13 | 31641248  | T | C | 0.5703 | 0.0092  | 0.0014 | 8.630E-11 |
| rs17680712  | 8  | 87300775  | T | C | 0.4369 | -0.0092 | 0.0014 | 8.630E-11 |
| rs57349798  | 6  | 37486052  | A | G | 0.4094 | 0.0093  | 0.0014 | 8.630E-11 |
| rs17144467  | 7  | 122098782 | A | C | 0.6867 | 0.0098  | 0.0015 | 8.740E-11 |
| rs2297293   | 21 | 47125046  | C | G | 0.3141 | 0.0099  | 0.0015 | 8.800E-11 |
| rs74787922  | 2  | 141598681 | A | C | 0.9333 | 0.0182  | 0.0028 | 8.970E-11 |
| rs1050847   | 16 | 87443734  | T | C | 0.5626 | 0.0092  | 0.0014 | 9.200E-11 |
| rs72902523  | 18 | 36565421  | T | C | 0.2594 | -0.0103 | 0.0016 | 9.850E-11 |
| rs1106090   | 2  | 58068741  | A | G | 0.6228 | 0.0094  | 0.0014 | 1.000E-10 |
| rs12891042  | 14 | 34018986  | T | C | 0.5853 | 0.0092  | 0.0014 | 1.020E-10 |
| rs10098073  | 8  | 143309504 | A | C | 0.4775 | -0.0091 | 0.0014 | 1.030E-10 |
| rs13010566  | 2  | 125873208 | A | C | 0.4718 | -0.0091 | 0.0014 | 1.030E-10 |
| rs2336721   | 3  | 53028375  | T | C | 0.3778 | 0.0095  | 0.0015 | 1.050E-10 |
| rs1007731   | 14 | 37054590  | A | C | 0.1159 | -0.0143 | 0.0022 | 1.050E-10 |
| rs10042828  | 5  | 88308777  | A | G | 0.8885 | -0.0145 | 0.0022 | 1.060E-10 |
| rs2434672   | 5  | 11471879  | A | C | 0.5321 | 0.0091  | 0.0014 | 1.060E-10 |
| rs6881581   | 5  | 140946355 | A | G | 0.3278 | -0.0096 | 0.0015 | 1.080E-10 |
| rs72792395  | 2  | 44886144  | T | C | 0.1093 | -0.0145 | 0.0022 | 1.090E-10 |
| rs10750539  | 11 | 133548873 | A | G | 0.3517 | -0.0095 | 0.0015 | 1.110E-10 |
| rs1485300   | 8  | 120082253 | C | G | 0.6682 | 0.0098  | 0.0015 | 1.140E-10 |
| rs9388490   | 6  | 126704795 | T | C | 0.4437 | 0.0091  | 0.0014 | 1.150E-10 |
| rs12519073  | 5  | 136776762 | T | C | 0.2317 | -0.0107 | 0.0017 | 1.160E-10 |
| rs12912465  | 15 | 77309459  | T | C | 0.2690 | -0.0104 | 0.0016 | 1.170E-10 |
| rs76552497  | 8  | 12679680  | T | C | 0.1704 | -0.0120 | 0.0019 | 1.170E-10 |
| rs6573552   | 14 | 64750233  | T | C | 0.4960 | -0.0090 | 0.0014 | 1.170E-10 |
| rs1717204   | 3  | 118461145 | A | C | 0.1818 | -0.0117 | 0.0018 | 1.200E-10 |
| rs11693885  | 2  | 60122046  | A | G | 0.4522 | -0.0091 | 0.0014 | 1.220E-10 |
| rs7012546   | 8  | 105067737 | T | C | 0.4166 | 0.0092  | 0.0014 | 1.250E-10 |
| rs2665668   | 2  | 60768978  | A | G | 0.6413 | -0.0094 | 0.0015 | 1.250E-10 |
| rs1301838   | 11 | 99670514  | T | C | 0.3227 | -0.0096 | 0.0015 | 1.290E-10 |
| rs62256284  | 3  | 70526305  | T | C | 0.2093 | 0.0111  | 0.0017 | 1.320E-10 |
| rs198262    | 14 | 57283283  | T | C | 0.9574 | -0.0223 | 0.0035 | 1.320E-10 |
| rs2212430   | 11 | 109289538 | T | C | 0.3038 | -0.0100 | 0.0016 | 1.320E-10 |
| rs13029602  | 2  | 29574875  | T | C | 0.6059 | -0.0092 | 0.0014 | 1.330E-10 |
| rs7692359   | 4  | 83209346  | T | C | 0.7786 | -0.0109 | 0.0017 | 1.400E-10 |
| rs1738050   | 1  | 44707295  | C | G | 0.6197 | -0.0093 | 0.0014 | 1.420E-10 |
| rs17110109  | 12 | 54668908  | T | C | 0.6163 | -0.0093 | 0.0014 | 1.470E-10 |
| rs11789013  | 9  | 109677417 | T | C | 0.7585 | 0.0106  | 0.0016 | 1.470E-10 |



|             |    |           |   |   |        |         |        |           |
|-------------|----|-----------|---|---|--------|---------|--------|-----------|
| rs12438177  | 15 | 55951432  | A | G | 0.3676 | 0.0093  | 0.0015 | 1.480E-10 |
| rs1527878   | 2  | 183446535 | A | G | 0.7566 | -0.0105 | 0.0016 | 1.490E-10 |
| rs7190      | 18 | 5889765   | A | G | 0.3514 | -0.0095 | 0.0015 | 1.500E-10 |
| rs9359939   | 6  | 92133241  | A | C | 0.2431 | -0.0105 | 0.0016 | 1.510E-10 |
| rs4480339   | 1  | 91096799  | A | C | 0.6926 | -0.0097 | 0.0015 | 1.530E-10 |
| rs2029401   | 5  | 92891029  | A | G | 0.4278 | -0.0091 | 0.0014 | 1.530E-10 |
| rs111821073 | 9  | 99084793  | T | C | 0.1567 | 0.0124  | 0.0019 | 1.580E-10 |
| rs2368831   | 12 | 188285    | T | C | 0.5736 | -0.0092 | 0.0014 | 1.630E-10 |
| rs62155350  | 2  | 98932980  | A | G | 0.0186 | 0.0338  | 0.0053 | 1.690E-10 |
| rs10772644  | 12 | 13417617  | C | G | 0.8887 | 0.0142  | 0.0022 | 1.690E-10 |
| rs56794817  | 17 | 60001978  | A | G | 0.1615 | 0.0122  | 0.0019 | 1.690E-10 |
| rs112806496 | 2  | 80421805  | C | G | 0.9129 | -0.0160 | 0.0025 | 1.720E-10 |
| rs12431682  | 14 | 101539999 | T | C | 0.3699 | -0.0093 | 0.0015 | 1.730E-10 |
| rs17747544  | 20 | 41211913  | A | G | 0.4701 | -0.0090 | 0.0014 | 1.740E-10 |
| rs7772172   | 6  | 16662928  | A | G | 0.4009 | 0.0091  | 0.0014 | 1.740E-10 |
| rs7552964   | 1  | 69331299  | A | T | 0.1013 | 0.0148  | 0.0023 | 1.780E-10 |
| rs9924031   | 16 | 19267144  | C | G | 0.3828 | 0.0093  | 0.0015 | 1.810E-10 |
| rs4812697   | 20 | 41975395  | T | G | 0.9248 | 0.0171  | 0.0027 | 1.880E-10 |
| rs4925109   | 17 | 17661802  | A | G | 0.3172 | -0.0096 | 0.0015 | 1.910E-10 |
| rs6472208   | 8  | 66474730  | T | C | 0.4033 | -0.0091 | 0.0014 | 2.000E-10 |
| rs73191311  | 8  | 4796094   | A | G | 0.3363 | -0.0094 | 0.0015 | 2.030E-10 |
| rs11894424  | 2  | 80588091  | A | C | 0.9524 | 0.0209  | 0.0033 | 2.140E-10 |
| rs1603460   | 12 | 23092626  | T | G | 0.4206 | 0.0090  | 0.0014 | 2.200E-10 |
| rs66671632  | 8  | 143680772 | T | C | 0.1299 | -0.0133 | 0.0021 | 2.240E-10 |
| rs567003    | 7  | 105341608 | A | G | 0.3538 | 0.0094  | 0.0015 | 2.270E-10 |
| rs2942884   | 2  | 101323578 | A | G | 0.4639 | -0.0090 | 0.0014 | 2.270E-10 |
| rs17133297  | 7  | 3455401   | A | T | 0.8958 | -0.0146 | 0.0023 | 2.280E-10 |
| rs4731413   | 7  | 127836132 | A | G | 0.2058 | 0.0111  | 0.0017 | 2.310E-10 |
| rs1123285   | 14 | 57274519  | C | G | 0.6659 | -0.0094 | 0.0015 | 2.380E-10 |
| rs62194170  | 2  | 161866504 | A | G | 0.2025 | 0.0111  | 0.0017 | 2.410E-10 |
| rs1734370   | 2  | 10978710  | A | G | 0.7171 | 0.0099  | 0.0016 | 2.420E-10 |
| rs11174399  | 12 | 62646556  | A | G | 0.2008 | 0.0111  | 0.0018 | 2.420E-10 |
| rs72667460  | 1  | 66536012  | T | C | 0.0539 | 0.0197  | 0.0031 | 2.440E-10 |
| rs75500877  | 1  | 181596751 | T | C | 0.0485 | 0.0207  | 0.0033 | 2.480E-10 |
| rs9849884   | 3  | 68869923  | A | T | 0.5836 | -0.0090 | 0.0014 | 2.510E-10 |
| rs112210983 | 16 | 14674204  | A | G | 0.2308 | 0.0105  | 0.0017 | 2.660E-10 |
| rs57437407  | 3  | 86173623  | A | G | 0.8900 | -0.0145 | 0.0023 | 2.670E-10 |
| rs42210     | 5  | 166408788 | C | G | 0.7122 | -0.0098 | 0.0016 | 2.740E-10 |
| rs1952183   | 14 | 89844111  | A | G | 0.5078 | -0.0089 | 0.0014 | 2.760E-10 |
| rs7650602   | 3  | 141147414 | T | C | 0.5599 | -0.0089 | 0.0014 | 2.770E-10 |
| rs142747148 | 13 | 58271461  | A | G | 0.9811 | 0.0329  | 0.0052 | 2.840E-10 |
| rs34262657  | 15 | 63849287  | T | G | 0.9619 | -0.0240 | 0.0038 | 2.840E-10 |
| rs7451726   | 6  | 28382494  | A | G | 0.7947 | 0.0109  | 0.0017 | 2.860E-10 |
| rs116656374 | 3  | 49413266  | T | G | 0.0373 | -0.0242 | 0.0038 | 2.950E-10 |
| rs7356536   | 5  | 87083961  | T | C | 0.8647 | -0.0129 | 0.0021 | 2.950E-10 |
| rs10009513  | 4  | 38591860  | A | G | 0.4830 | 0.0088  | 0.0014 | 3.020E-10 |
| rs1918394   | 3  | 74903904  | T | C | 0.1658 | 0.0119  | 0.0019 | 3.040E-10 |
| rs137079    | 22 | 42977907  | T | C | 0.1375 | 0.0128  | 0.0020 | 3.060E-10 |
| rs13261773  | 8  | 120187090 | C | G | 0.1602 | 0.0122  | 0.0019 | 3.120E-10 |
| rs80257979  | 12 | 49402562  | T | G | 0.9677 | -0.0252 | 0.0040 | 3.310E-10 |
| rs9977825   | 21 | 46494995  | T | C | 0.3655 | -0.0092 | 0.0015 | 3.370E-10 |
| rs34286836  | 6  | 148273664 | T | C | 0.4479 | -0.0089 | 0.0014 | 3.440E-10 |
| rs187580    | 5  | 102627355 | T | G | 0.7671 | -0.0104 | 0.0017 | 3.560E-10 |
| rs182355396 | 3  | 50920457  | A | C | 0.0084 | -0.0525 | 0.0084 | 3.670E-10 |
| rs10205057  | 2  | 186139826 | T | C | 0.5619 | 0.0090  | 0.0014 | 3.670E-10 |
| rs12810587  | 12 | 122675576 | T | C | 0.3256 | 0.0094  | 0.0015 | 3.700E-10 |
| rs32940     | 5  | 141132286 | T | C | 0.3001 | -0.0096 | 0.0015 | 3.720E-10 |
| rs61739710  | 21 | 34925689  | A | G | 0.2813 | -0.0099 | 0.0016 | 3.740E-10 |

|             |    |           |   |   |        |         |        |           |
|-------------|----|-----------|---|---|--------|---------|--------|-----------|
| rs3111251   | 1  | 211409844 | T | C | 0.4325 | -0.0090 | 0.0014 | 3.880E-10 |
| rs2365376   | 5  | 88740323  | A | C | 0.3503 | 0.0092  | 0.0015 | 3.930E-10 |
| rs3948495   | 2  | 57383133  | T | G | 0.4079 | -0.0089 | 0.0014 | 3.950E-10 |
| rs13281564  | 8  | 119483316 | A | G | 0.5129 | 0.0088  | 0.0014 | 4.020E-10 |
| rs12325727  | 17 | 47028472  | A | G | 0.4756 | 0.0088  | 0.0014 | 4.100E-10 |
| rs17113730  | 12 | 74936526  | A | G | 0.0717 | -0.0170 | 0.0027 | 4.100E-10 |
| rs4663617   | 2  | 236744626 | A | T | 0.2350 | 0.0104  | 0.0017 | 4.120E-10 |
| rs10974256  | 9  | 3952892   | A | G | 0.3411 | -0.0093 | 0.0015 | 4.120E-10 |
| rs11130380  | 3  | 53758950  | T | G | 0.6135 | 0.0090  | 0.0014 | 4.170E-10 |
| rs2254681   | 1  | 159248048 | A | G | 0.2517 | 0.0101  | 0.0016 | 4.250E-10 |
| rs10761202  | 9  | 96019970  | T | C | 0.4946 | 0.0088  | 0.0014 | 4.280E-10 |
| rs2702576   | 4  | 15058245  | A | G | 0.3829 | -0.0090 | 0.0014 | 4.410E-10 |
| rs17622379  | 17 | 50726846  | T | C | 0.1853 | -0.0113 | 0.0018 | 4.520E-10 |
| rs76235882  | 9  | 121096681 | A | G | 0.9660 | 0.0241  | 0.0039 | 4.520E-10 |
| rs117468730 | 16 | 10205467  | A | G | 0.0205 | -0.0310 | 0.0050 | 4.570E-10 |
| rs11030102  | 11 | 27681596  | C | G | 0.7479 | 0.0101  | 0.0016 | 4.600E-10 |
| rs2885198   | 3  | 143636421 | A | G | 0.5318 | 0.0088  | 0.0014 | 4.630E-10 |
| rs580652    | 11 | 84904742  | T | C | 0.9017 | -0.0147 | 0.0024 | 4.650E-10 |
| rs9820604   | 3  | 72363674  | T | C | 0.8254 | 0.0115  | 0.0018 | 4.800E-10 |
| rs806816    | 10 | 32285942  | A | T | 0.7498 | 0.0101  | 0.0016 | 4.800E-10 |
| rs62092949  | 18 | 48779673  | T | C | 0.4856 | -0.0087 | 0.0014 | 4.860E-10 |
| rs2023016   | 6  | 162981266 | C | G | 0.7899 | 0.0107  | 0.0017 | 4.910E-10 |
| rs481940    | 1  | 71442457  | T | C | 0.2546 | 0.0100  | 0.0016 | 4.940E-10 |
| rs72694479  | 14 | 85112638  | T | G | 0.1412 | 0.0127  | 0.0020 | 4.940E-10 |
| rs10844179  | 12 | 32469601  | A | G | 0.2257 | 0.0104  | 0.0017 | 5.030E-10 |
| rs9858921   | 3  | 161148946 | A | G | 0.4661 | -0.0087 | 0.0014 | 5.190E-10 |
| rs1391513   | 1  | 216693263 | T | C | 0.6911 | -0.0095 | 0.0015 | 5.250E-10 |
| rs11023764  | 11 | 15910939  | A | G | 0.6418 | 0.0091  | 0.0015 | 5.320E-10 |
| rs13296345  | 9  | 14791348  | T | C | 0.6299 | 0.0090  | 0.0015 | 5.350E-10 |
| rs11003463  | 10 | 51801793  | T | G | 0.6114 | 0.0091  | 0.0015 | 5.580E-10 |
| rs1408284   | 6  | 93893586  | C | G | 0.8639 | -0.0127 | 0.0020 | 5.710E-10 |
| rs4458044   | 17 | 43873727  | C | G | 0.2581 | 0.0101  | 0.0016 | 5.710E-10 |
| rs78440611  | 12 | 123144189 | A | G | 0.9026 | -0.0147 | 0.0024 | 5.710E-10 |
| rs139980871 | 18 | 36648364  | T | C | 0.0633 | 0.0180  | 0.0029 | 5.780E-10 |
| rs76876592  | 13 | 67141932  | A | G | 0.8609 | 0.0126  | 0.0020 | 5.820E-10 |
| rs1933264   | 6  | 153391618 | T | C | 0.7491 | 0.0100  | 0.0016 | 5.850E-10 |
| rs7035315   | 9  | 83231511  | A | G | 0.6292 | -0.0090 | 0.0015 | 5.850E-10 |
| rs7495033   | 15 | 75206225  | A | T | 0.6890 | 0.0095  | 0.0015 | 5.920E-10 |
| rs4423373   | 15 | 27988340  | A | G | 0.5386 | -0.0087 | 0.0014 | 6.000E-10 |
| rs17131123  | 1  | 91126097  | A | G | 0.9659 | -0.0243 | 0.0039 | 6.290E-10 |
| rs12359372  | 10 | 67767951  | T | C | 0.6624 | -0.0092 | 0.0015 | 6.330E-10 |
| rs763553    | 8  | 31445496  | A | G | 0.4452 | 0.0087  | 0.0014 | 6.410E-10 |
| rs72906124  | 2  | 157076201 | T | C | 0.9420 | 0.0185  | 0.0030 | 6.440E-10 |
| rs6956283   | 7  | 98756597  | T | C | 0.7342 | 0.0098  | 0.0016 | 6.440E-10 |
| rs76241605  | 4  | 140717160 | A | G | 0.1142 | 0.0139  | 0.0022 | 6.480E-10 |
| rs76246107  | 19 | 50121274  | A | G | 0.0941 | -0.0162 | 0.0026 | 6.520E-10 |
| rs9513754   | 13 | 101043420 | T | C | 0.2906 | 0.0096  | 0.0016 | 6.640E-10 |
| rs255053    | 16 | 68020492  | A | G | 0.1913 | -0.0111 | 0.0018 | 6.680E-10 |
| rs8016504   | 14 | 33308021  | A | C | 0.5427 | -0.0087 | 0.0014 | 6.840E-10 |
| rs62155770  | 2  | 99981222  | A | G | 0.9474 | -0.0196 | 0.0032 | 6.880E-10 |
| rs62090515  | 18 | 42671636  | A | G | 0.3605 | -0.0090 | 0.0015 | 6.880E-10 |
| rs151381    | 4  | 103118768 | T | C | 0.4927 | -0.0087 | 0.0014 | 7.010E-10 |
| rs10080647  | 6  | 114742335 | A | C | 0.1405 | 0.0124  | 0.0020 | 7.050E-10 |
| rs1408430   | 20 | 14917048  | C | G | 0.7193 | 0.0096  | 0.0016 | 7.090E-10 |
| rs232496    | 21 | 22734409  | T | C | 0.3657 | 0.0090  | 0.0015 | 7.140E-10 |
| rs10519504  | 4  | 140640283 | T | G | 0.1561 | 0.0119  | 0.0019 | 7.310E-10 |
| rs236318    | 1  | 94050221  | C | G | 0.2346 | -0.0102 | 0.0017 | 7.400E-10 |
| rs1267062   | 2  | 162000266 | C | G | 0.1781 | 0.0113  | 0.0018 | 7.400E-10 |

|             |    |           |   |   |        |         |        |           |
|-------------|----|-----------|---|---|--------|---------|--------|-----------|
| rs1671269   | 18 | 50109971  | T | C | 0.7524 | -0.0100 | 0.0016 | 7.400E-10 |
| rs13381557  | 18 | 44513371  | A | G | 0.5413 | -0.0087 | 0.0014 | 7.400E-10 |
| rs68145588  | 17 | 75864805  | T | G | 0.1395 | -0.0127 | 0.0021 | 7.530E-10 |
| rs7171405   | 15 | 61466893  | A | G | 0.2432 | -0.0101 | 0.0016 | 7.530E-10 |
| rs11211123  | 1  | 45957609  | A | G | 0.2228 | 0.0104  | 0.0017 | 7.620E-10 |
| rs2740795   | 8  | 91927455  | A | T | 0.7377 | 0.0098  | 0.0016 | 7.710E-10 |
| rs17205908  | 6  | 127764305 | T | C | 0.3311 | -0.0092 | 0.0015 | 7.710E-10 |
| rs10928190  | 2  | 144376033 | T | C | 0.4520 | -0.0087 | 0.0014 | 7.760E-10 |
| rs4984613   | 15 | 65023232  | T | G | 0.0683 | 0.0174  | 0.0028 | 7.760E-10 |
| rs17609255  | 17 | 50274170  | T | C | 0.4176 | -0.0087 | 0.0014 | 7.900E-10 |
| rs11919835  | 3  | 70954273  | C | G | 0.3857 | 0.0089  | 0.0015 | 7.950E-10 |
| rs6720515   | 2  | 156603535 | A | T | 0.7763 | 0.0103  | 0.0017 | 7.950E-10 |
| rs35751693  | 2  | 98242555  | T | C | 0.0348 | -0.0246 | 0.0040 | 8.040E-10 |
| rs16975275  | 15 | 96046556  | A | G | 0.2306 | -0.0102 | 0.0017 | 8.140E-10 |
| rs181214    | 17 | 56179482  | T | C | 0.2225 | -0.0104 | 0.0017 | 8.190E-10 |
| rs818415    | 16 | 65448079  | T | G | 0.8092 | -0.0110 | 0.0018 | 8.190E-10 |
| rs117273411 | 9  | 23385738  | T | C | 0.9540 | -0.0211 | 0.0034 | 8.590E-10 |
| rs62506074  | 8  | 30906089  | T | C | 0.3430 | 0.0091  | 0.0015 | 8.640E-10 |
| rs2007655   | 10 | 34586689  | T | G | 0.4976 | 0.0086  | 0.0014 | 8.640E-10 |
| rs4685405   | 3  | 16981683  | T | G | 0.1824 | -0.0111 | 0.0018 | 8.690E-10 |
| rs34363861  | 2  | 73490412  | A | G | 0.5194 | 0.0087  | 0.0014 | 8.690E-10 |
| rs1963381   | 18 | 36125986  | A | G | 0.7506 | 0.0099  | 0.0016 | 8.800E-10 |
| rs72673097  | 1  | 44087925  | A | G | 0.0299 | 0.0257  | 0.0042 | 8.900E-10 |
| rs2554835   | 18 | 74141190  | A | G | 0.3998 | 0.0088  | 0.0014 | 8.950E-10 |
| rs9927049   | 16 | 71860008  | A | G | 0.7453 | 0.0099  | 0.0016 | 9.280E-10 |
| rs72944064  | 18 | 63516255  | T | C | 0.7437 | -0.0098 | 0.0016 | 9.390E-10 |
| rs6729612   | 2  | 152780167 | T | C | 0.6760 | 0.0092  | 0.0015 | 9.390E-10 |
| rs11917701  | 3  | 117174568 | A | G | 0.4041 | -0.0087 | 0.0014 | 9.450E-10 |
| rs6696068   | 1  | 53740797  | T | G | 0.3838 | -0.0088 | 0.0014 | 9.500E-10 |
| rs7449561   | 6  | 66215549  | A | G | 0.2260 | 0.0102  | 0.0017 | 9.730E-10 |
| rs112512729 | 3  | 24905460  | T | G | 0.9282 | -0.0166 | 0.0027 | 9.910E-10 |
| rs9866123   | 3  | 20631298  | A | G | 0.4804 | 0.0086  | 0.0014 | 1.020E-09 |
| rs143812851 | 16 | 61773849  | A | G | 0.1735 | -0.0113 | 0.0019 | 1.030E-09 |
| rs164938    | 3  | 10315103  | T | G | 0.3922 | -0.0088 | 0.0014 | 1.050E-09 |
| rs29792     | 5  | 168978148 | A | T | 0.3032 | -0.0093 | 0.0015 | 1.060E-09 |
| rs1061801   | 6  | 33282338  | A | G | 0.1870 | -0.0110 | 0.0018 | 1.060E-09 |
| rs7255223   | 19 | 32824310  | A | C | 0.2691 | 0.0097  | 0.0016 | 1.060E-09 |
| rs188251563 | 10 | 103744305 | A | G | 0.9895 | 0.0428  | 0.0070 | 1.070E-09 |
| rs60717745  | 7  | 75846083  | C | G | 0.8440 | -0.0118 | 0.0019 | 1.080E-09 |
| rs1880692   | 11 | 80338069  | A | G | 0.5346 | 0.0086  | 0.0014 | 1.090E-09 |
| rs6469654   | 8  | 117632965 | C | G | 0.7769 | -0.0103 | 0.0017 | 1.100E-09 |
| rs1880088   | 11 | 20959185  | A | T | 0.2618 | -0.0097 | 0.0016 | 1.110E-09 |
| rs10947439  | 6  | 33774948  | T | C | 0.6627 | 0.0090  | 0.0015 | 1.110E-09 |
| rs12709186  | 16 | 7249472   | A | G | 0.3236 | -0.0091 | 0.0015 | 1.120E-09 |
| rs7575938   | 2  | 166910677 | A | G | 0.3408 | 0.0090  | 0.0015 | 1.130E-09 |
| rs6871635   | 5  | 133830395 | A | G | 0.4300 | -0.0087 | 0.0014 | 1.160E-09 |
| rs1980129   | 4  | 17045911  | A | G | 0.4738 | 0.0085  | 0.0014 | 1.170E-09 |
| rs11780023  | 8  | 141992778 | T | C | 0.5051 | 0.0085  | 0.0014 | 1.170E-09 |
| rs7775100   | 6  | 96519657  | T | C | 0.3906 | -0.0087 | 0.0014 | 1.200E-09 |
| rs74462621  | 8  | 133732856 | T | C | 0.1357 | 0.0125  | 0.0020 | 1.210E-09 |
| rs73643713  | 9  | 4163612   | T | C | 0.9280 | -0.0165 | 0.0027 | 1.240E-09 |
| rs62190914  | 2  | 236788175 | T | C | 0.6360 | 0.0089  | 0.0015 | 1.250E-09 |
| rs1538389   | 1  | 112327144 | T | C | 0.1894 | -0.0109 | 0.0018 | 1.270E-09 |
| rs17883331  | 19 | 4954455   | A | G | 0.1918 | -0.0108 | 0.0018 | 1.290E-09 |
| rs73874335  | 3  | 157933483 | T | C | 0.0607 | -0.0178 | 0.0029 | 1.290E-09 |
| rs2929860   | 3  | 128691941 | T | C | 0.1878 | 0.0110  | 0.0018 | 1.330E-09 |
| rs1427298   | 2  | 145214421 | T | C | 0.4264 | 0.0086  | 0.0014 | 1.330E-09 |
| rs1009470   | 9  | 122289187 | T | G | 0.4414 | 0.0086  | 0.0014 | 1.340E-09 |

|             |    |           |   |   |        |         |        |           |
|-------------|----|-----------|---|---|--------|---------|--------|-----------|
| rs893522    | 3  | 165560618 | A | C | 0.9112 | 0.0149  | 0.0025 | 1.390E-09 |
| rs138484388 | 3  | 49511263  | T | C | 0.0224 | -0.0306 | 0.0051 | 1.400E-09 |
| rs322614    | 11 | 29755547  | A | G | 0.3817 | -0.0087 | 0.0014 | 1.430E-09 |
| rs12746551  | 1  | 114374966 | C | G | 0.9689 | 0.0248  | 0.0041 | 1.440E-09 |
| rs2416759   | 9  | 123358262 | A | G | 0.6986 | -0.0093 | 0.0015 | 1.450E-09 |
| rs429150    | 6  | 32075563  | T | C | 0.5292 | 0.0085  | 0.0014 | 1.500E-09 |
| rs11876620  | 18 | 52737309  | T | C | 0.0973 | 0.0143  | 0.0024 | 1.520E-09 |
| rs16871807  | 5  | 3437297   | T | C | 0.3297 | 0.0090  | 0.0015 | 1.590E-09 |
| rs12970264  | 18 | 77627950  | A | G | 0.4386 | -0.0085 | 0.0014 | 1.610E-09 |
| rs11644446  | 16 | 7943552   | A | G | 0.1562 | 0.0117  | 0.0019 | 1.610E-09 |
| rs2024568   | 20 | 44732089  | T | C | 0.2535 | -0.0097 | 0.0016 | 1.610E-09 |
| rs4687735   | 3  | 53684371  | T | C | 0.0475 | -0.0200 | 0.0033 | 1.630E-09 |
| rs76267866  | 3  | 70540347  | A | T | 0.7926 | 0.0104  | 0.0017 | 1.640E-09 |
| rs1841023   | 4  | 163735584 | A | C | 0.6904 | -0.0092 | 0.0015 | 1.640E-09 |
| rs1758747   | 9  | 25300643  | A | G | 0.6962 | 0.0092  | 0.0015 | 1.640E-09 |
| rs12659776  | 5  | 167621274 | T | G | 0.5399 | 0.0085  | 0.0014 | 1.640E-09 |
| rs113588399 | 6  | 157236426 | T | C | 0.2079 | -0.0104 | 0.0017 | 1.670E-09 |
| rs12028229  | 1  | 72986136  | T | G | 0.2631 | 0.0099  | 0.0016 | 1.670E-09 |
| rs7597412   | 2  | 142069014 | C | G | 0.3688 | 0.0088  | 0.0015 | 1.680E-09 |
| rs17574007  | 2  | 51230274  | A | C | 0.1215 | -0.0129 | 0.0021 | 1.690E-09 |
| rs12127928  | 1  | 28708529  | T | C | 0.8057 | 0.0108  | 0.0018 | 1.690E-09 |
| rs11598765  | 10 | 23953725  | A | G | 0.1966 | -0.0106 | 0.0018 | 1.730E-09 |
| rs6060308   | 20 | 33794378  | A | G | 0.2788 | 0.0095  | 0.0016 | 1.760E-09 |
| rs1544      | 21 | 33085585  | A | G | 0.2636 | -0.0096 | 0.0016 | 1.760E-09 |
| rs2358628   | 14 | 74631757  | A | C | 0.3122 | -0.0091 | 0.0015 | 1.780E-09 |
| rs7967550   | 12 | 92145307  | A | G | 0.3998 | -0.0086 | 0.0014 | 1.790E-09 |
| rs62051146  | 16 | 72497721  | A | C | 0.8886 | -0.0134 | 0.0022 | 1.790E-09 |
| rs852771    | 1  | 58288317  | T | C | 0.6963 | 0.0092  | 0.0015 | 1.840E-09 |
| rs12761729  | 10 | 107619932 | T | C | 0.7441 | -0.0098 | 0.0016 | 1.870E-09 |
| rs2898191   | 21 | 34288509  | A | C | 0.6921 | 0.0093  | 0.0015 | 1.880E-09 |
| rs6946362   | 7  | 6574807   | T | C | 0.6884 | 0.0091  | 0.0015 | 1.890E-09 |
| rs2100249   | 7  | 113848497 | T | G | 0.3488 | -0.0089 | 0.0015 | 1.910E-09 |
| rs2916490   | 2  | 80192352  | A | G | 0.3023 | -0.0092 | 0.0015 | 1.920E-09 |
| rs6480234   | 10 | 68636894  | T | C | 0.5250 | -0.0084 | 0.0014 | 1.940E-09 |
| rs114810763 | 6  | 30398390  | A | G | 0.1549 | -0.0121 | 0.0020 | 1.980E-09 |
| rs28513882  | 3  | 107296628 | A | G | 0.1783 | -0.0110 | 0.0018 | 2.030E-09 |
| rs10208     | 17 | 42300278  | T | C | 0.3173 | 0.0091  | 0.0015 | 2.070E-09 |
| rs11724690  | 4  | 186764747 | T | G | 0.2887 | 0.0093  | 0.0015 | 2.080E-09 |
| rs2657283   | 10 | 76920199  | T | C | 0.5884 | 0.0085  | 0.0014 | 2.080E-09 |
| rs933738    | 12 | 49943122  | A | G | 0.8193 | -0.0110 | 0.0018 | 2.080E-09 |
| rs41282553  | 22 | 31286928  | A | G | 0.0339 | 0.0237  | 0.0040 | 2.090E-09 |
| rs9513416   | 13 | 99055774  | A | G | 0.8437 | -0.0116 | 0.0019 | 2.180E-09 |
| rs4658019   | 1  | 196149936 | T | C | 0.4531 | 0.0084  | 0.0014 | 2.190E-09 |
| rs4788115   | 16 | 28998111  | A | T | 0.1804 | 0.0111  | 0.0019 | 2.270E-09 |
| rs34394051  | 1  | 6853091   | A | G | 0.8429 | -0.0117 | 0.0020 | 2.300E-09 |
| rs9568798   | 13 | 53614554  | T | C | 0.2912 | -0.0093 | 0.0016 | 2.300E-09 |
| rs12054166  | 3  | 150093445 | C | G | 0.7399 | 0.0096  | 0.0016 | 2.300E-09 |
| rs8097125   | 18 | 13005473  | T | C | 0.3802 | 0.0086  | 0.0014 | 2.310E-09 |
| rs4719460   | 7  | 859610    | T | C | 0.6560 | -0.0088 | 0.0015 | 2.340E-09 |
| rs59967356  | 3  | 71639294  | T | C | 0.8698 | -0.0127 | 0.0021 | 2.340E-09 |
| rs312945    | 2  | 21328825  | A | G | 0.3051 | -0.0091 | 0.0015 | 2.340E-09 |
| rs7816777   | 8  | 19371767  | T | C | 0.3526 | -0.0088 | 0.0015 | 2.350E-09 |
| rs9465509   | 6  | 19744129  | A | G | 0.4824 | -0.0084 | 0.0014 | 2.350E-09 |
| rs1404549   | 3  | 65454923  | A | G | 0.3278 | -0.0089 | 0.0015 | 2.380E-09 |
| rs12962845  | 18 | 22654102  | C | G | 0.1325 | -0.0123 | 0.0021 | 2.380E-09 |
| rs7855503   | 9  | 86381638  | C | G | 0.3478 | 0.0088  | 0.0015 | 2.390E-09 |
| rs1564347   | 15 | 73438848  | T | G | 0.3433 | 0.0088  | 0.0015 | 2.390E-09 |
| rs736281    | 14 | 94287830  | T | C | 0.3931 | 0.0086  | 0.0014 | 2.490E-09 |

|             |    |           |   |   |        |         |        |           |
|-------------|----|-----------|---|---|--------|---------|--------|-----------|
| rs12113634  | 7  | 111996952 | T | C | 0.6504 | 0.0088  | 0.0015 | 2.500E-09 |
| rs631287    | 9  | 128412676 | A | G | 0.5580 | 0.0084  | 0.0014 | 2.520E-09 |
| rs6917154   | 6  | 167135156 | T | C | 0.1236 | 0.0127  | 0.0021 | 2.550E-09 |
| rs6757087   | 2  | 212680523 | T | G | 0.5755 | -0.0085 | 0.0014 | 2.550E-09 |
| rs28587776  | 5  | 177030177 | T | C | 0.3541 | 0.0088  | 0.0015 | 2.550E-09 |
| rs2034631   | 4  | 82225529  | T | C | 0.6508 | 0.0089  | 0.0015 | 2.640E-09 |
| rs62103198  | 18 | 77634276  | T | C | 0.9087 | -0.0147 | 0.0025 | 2.690E-09 |
| rs1542354   | 2  | 221814085 | A | G | 0.4764 | -0.0084 | 0.0014 | 2.720E-09 |
| rs8052523   | 16 | 9293246   | T | C | 0.5697 | -0.0084 | 0.0014 | 2.730E-09 |
| rs622169    | 1  | 244437407 | T | C | 0.4536 | 0.0086  | 0.0014 | 2.730E-09 |
| rs34811474  | 4  | 25408838  | A | G | 0.2242 | 0.0104  | 0.0017 | 2.750E-09 |
| rs12981405  | 19 | 19651577  | T | C | 0.1664 | -0.0112 | 0.0019 | 2.750E-09 |
| rs2332179   | 3  | 122079430 | A | G | 0.8610 | 0.0121  | 0.0020 | 2.760E-09 |
| rs62174974  | 2  | 185053385 | A | G | 0.1949 | -0.0105 | 0.0018 | 2.760E-09 |
| rs10877283  | 12 | 59837734  | T | G | 0.5973 | 0.0085  | 0.0014 | 2.860E-09 |
| rs10411759  | 19 | 1857297   | A | G | 0.1561 | 0.0116  | 0.0020 | 2.880E-09 |
| rs72917504  | 2  | 175225018 | T | C | 0.0583 | -0.0178 | 0.0030 | 2.910E-09 |
| rs113615161 | 7  | 114519339 | T | C | 0.1330 | -0.0123 | 0.0021 | 2.980E-09 |
| rs17882802  | 10 | 101983413 | A | G | 0.4295 | 0.0084  | 0.0014 | 3.000E-09 |
| rs60589532  | 2  | 58072605  | A | G | 0.9345 | 0.0168  | 0.0028 | 3.030E-09 |
| rs1097784   | 16 | 10249416  | T | C | 0.5021 | -0.0083 | 0.0014 | 3.050E-09 |
| rs10193498  | 2  | 174094345 | A | T | 0.7550 | 0.0097  | 0.0016 | 3.100E-09 |
| rs79855925  | 5  | 60095384  | T | C | 0.0488 | -0.0194 | 0.0033 | 3.100E-09 |
| rs10831656  | 11 | 11660815  | T | C | 0.3134 | 0.0090  | 0.0015 | 3.100E-09 |
| rs4785187   | 16 | 49766772  | A | G | 0.2253 | -0.0100 | 0.0017 | 3.120E-09 |
| rs2199409   | 11 | 39915234  | T | C | 0.7962 | 0.0103  | 0.0017 | 3.140E-09 |
| rs7905192   | 10 | 12711949  | T | C | 0.5720 | 0.0084  | 0.0014 | 3.140E-09 |
| rs55826493  | 2  | 12836640  | T | G | 0.1216 | -0.0127 | 0.0021 | 3.160E-09 |
| rs1427829   | 12 | 89760744  | A | G | 0.4546 | -0.0083 | 0.0014 | 3.290E-09 |
| rs61853335  | 10 | 64884737  | T | C | 0.1769 | -0.0109 | 0.0018 | 3.290E-09 |
| rs1529597   | 15 | 57190064  | A | C | 0.9637 | 0.0223  | 0.0038 | 3.360E-09 |
| rs12614263  | 2  | 4123797   | A | G | 0.4959 | 0.0083  | 0.0014 | 3.380E-09 |
| rs1024268   | 1  | 70117404  | T | C | 0.4186 | -0.0084 | 0.0014 | 3.400E-09 |
| rs9371883   | 6  | 155644978 | C | G | 0.6430 | -0.0087 | 0.0015 | 3.420E-09 |
| rs6490618   | 13 | 21338343  | T | C | 0.3270 | 0.0088  | 0.0015 | 3.480E-09 |
| rs28505285  | 7  | 44377654  | C | G | 0.1884 | 0.0106  | 0.0018 | 3.500E-09 |
| rs12568153  | 1  | 213151580 | T | G | 0.2902 | -0.0091 | 0.0015 | 3.520E-09 |
| rs1467737   | 9  | 124982500 | T | C | 0.4746 | -0.0084 | 0.0014 | 3.520E-09 |
| rs2805064   | 9  | 24530615  | C | G | 0.7291 | 0.0093  | 0.0016 | 3.540E-09 |
| rs7849480   | 9  | 14648130  | A | G | 0.4353 | -0.0084 | 0.0014 | 3.540E-09 |
| rs4127499   | 11 | 122176383 | A | G | 0.3495 | 0.0087  | 0.0015 | 3.560E-09 |
| rs74944857  | 4  | 66496914  | T | G | 0.3223 | -0.0089 | 0.0015 | 3.620E-09 |
| rs34298584  | 18 | 39026695  | A | G | 0.1688 | 0.0111  | 0.0019 | 3.670E-09 |
| rs12005151  | 9  | 135030649 | A | G | 0.3615 | 0.0087  | 0.0015 | 3.730E-09 |
| rs150252215 | 3  | 49296234  | A | T | 0.0437 | 0.0204  | 0.0035 | 3.820E-09 |
| rs58779949  | 11 | 64007159  | A | C | 0.1698 | 0.0110  | 0.0019 | 3.840E-09 |
| rs6020560   | 20 | 49119419  | T | C | 0.5258 | -0.0083 | 0.0014 | 3.840E-09 |
| rs34316274  | 16 | 1018697   | A | G | 0.7620 | 0.0097  | 0.0017 | 3.860E-09 |
| rs17186106  | 4  | 91703241  | T | G | 0.1771 | 0.0108  | 0.0018 | 3.950E-09 |
| rs977143    | 18 | 38028165  | A | G | 0.3725 | 0.0085  | 0.0015 | 3.950E-09 |
| rs9563168   | 13 | 54247827  | A | G | 0.2117 | 0.0101  | 0.0017 | 4.070E-09 |
| rs11030084  | 11 | 27643725  | T | C | 0.1845 | 0.0106  | 0.0018 | 4.070E-09 |
| rs4664983   | 2  | 159454438 | T | C | 0.1987 | -0.0103 | 0.0018 | 4.110E-09 |
| rs6503409   | 17 | 43058742  | T | C | 0.3463 | 0.0087  | 0.0015 | 4.110E-09 |
| rs6774533   | 3  | 62471086  | T | C | 0.6985 | 0.0090  | 0.0015 | 4.180E-09 |
| rs1107871   | 12 | 132240659 | A | G | 0.5506 | -0.0083 | 0.0014 | 4.180E-09 |
| rs16966271  | 15 | 38423730  | T | C | 0.2819 | 0.0092  | 0.0016 | 4.210E-09 |
| rs58996896  | 2  | 123735005 | A | G | 0.7388 | -0.0094 | 0.0016 | 4.230E-09 |

|             |    |           |   |   |        |         |        |           |
|-------------|----|-----------|---|---|--------|---------|--------|-----------|
| rs2458370   | 1  | 117874944 | T | C | 0.6409 | -0.0086 | 0.0015 | 4.230E-09 |
| rs10742591  | 11 | 41548956  | A | T | 0.6097 | -0.0084 | 0.0014 | 4.260E-09 |
| rs117623407 | 19 | 32204489  | A | G | 0.8536 | -0.0118 | 0.0020 | 4.300E-09 |
| rs2962378   | 5  | 90950210  | A | G | 0.7872 | 0.0101  | 0.0017 | 4.300E-09 |
| rs2373124   | 7  | 85830272  | A | G | 0.7604 | -0.0096 | 0.0016 | 4.350E-09 |
| rs2870281   | 4  | 91945572  | A | C | 0.4410 | -0.0083 | 0.0014 | 4.350E-09 |
| rs4810894   | 20 | 47532999  | A | G | 0.3706 | -0.0085 | 0.0015 | 4.380E-09 |
| rs10046069  | 5  | 89115576  | A | G | 0.1203 | 0.0127  | 0.0022 | 4.400E-09 |
| rs10006235  | 4  | 130670108 | T | C | 0.2689 | -0.0093 | 0.0016 | 4.480E-09 |
| rs12123293  | 1  | 210912835 | T | C | 0.6476 | 0.0086  | 0.0015 | 4.480E-09 |
| rs28482086  | 1  | 75226252  | A | G | 0.3494 | 0.0086  | 0.0015 | 4.510E-09 |
| rs12646216  | 4  | 45980056  | T | C | 0.3889 | 0.0084  | 0.0014 | 4.560E-09 |
| rs854796    | 17 | 18070761  | A | G | 0.6932 | 0.0090  | 0.0015 | 4.660E-09 |
| rs1593022   | 5  | 106685563 | T | G | 0.2256 | -0.0099 | 0.0017 | 4.690E-09 |
| rs736471    | 3  | 50519392  | T | C | 0.4653 | 0.0083  | 0.0014 | 4.690E-09 |
| rs8009933   | 14 | 39600212  | A | G | 0.6783 | 0.0088  | 0.0015 | 4.720E-09 |
| rs183869217 | 2  | 81751340  | C | G | 0.9409 | 0.0174  | 0.0030 | 4.720E-09 |
| rs35754740  | 16 | 63127870  | T | C | 0.5811 | 0.0083  | 0.0014 | 4.770E-09 |
| rs62018216  | 15 | 51387404  | T | G | 0.1549 | 0.0113  | 0.0019 | 4.830E-09 |
| rs59300999  | 21 | 33072363  | T | C | 0.9325 | -0.0164 | 0.0028 | 4.850E-09 |
| rs13177031  | 5  | 60853523  | A | T | 0.3703 | -0.0085 | 0.0015 | 4.880E-09 |
| rs72896637  | 2  | 183543531 | T | G | 0.0707 | 0.0162  | 0.0028 | 4.880E-09 |
| rs72834698  | 6  | 26176517  | A | G | 0.1440 | 0.0117  | 0.0020 | 4.910E-09 |
| rs2926702   | 8  | 71167994  | T | C | 0.8739 | -0.0124 | 0.0021 | 4.910E-09 |
| rs143743568 | 22 | 39289014  | A | G | 0.1540 | 0.0118  | 0.0020 | 4.990E-09 |
| rs39998     | 16 | 28133152  | A | C | 0.2967 | 0.0090  | 0.0015 | 5.020E-09 |
| rs13154429  | 5  | 59608950  | C | G | 0.1016 | -0.0136 | 0.0023 | 5.020E-09 |
| rs9927137   | 16 | 30634300  | A | G | 0.5298 | 0.0082  | 0.0014 | 5.110E-09 |
| rs57148205  | 2  | 225689421 | A | G | 0.2438 | 0.0095  | 0.0016 | 5.170E-09 |
| rs8103741   | 19 | 2325005   | A | G | 0.8220 | -0.0108 | 0.0019 | 5.170E-09 |
| rs16901689  | 5  | 11507368  | T | G | 0.1634 | 0.0111  | 0.0019 | 5.170E-09 |
| rs2077235   | 16 | 3629227   | T | C | 0.2373 | 0.0097  | 0.0017 | 5.200E-09 |
| rs4739235   | 8  | 21287105  | A | G | 0.1701 | 0.0109  | 0.0019 | 5.260E-09 |
| rs10879676  | 12 | 74152402  | T | C | 0.5833 | -0.0083 | 0.0014 | 5.290E-09 |
| rs7894722   | 10 | 9972046   | T | C | 0.3748 | 0.0085  | 0.0014 | 5.410E-09 |
| rs173003    | 19 | 36240960  | A | C | 0.4934 | -0.0082 | 0.0014 | 5.500E-09 |
| rs1835339   | 2  | 183393680 | T | C | 0.6132 | 0.0084  | 0.0014 | 5.590E-09 |
| rs62370510  | 5  | 52789198  | A | T | 0.1771 | -0.0109 | 0.0019 | 5.590E-09 |
| rs6977237   | 7  | 14027991  | T | C | 0.4725 | 0.0082  | 0.0014 | 5.590E-09 |
| rs7158218   | 14 | 73934880  | A | C | 0.7117 | -0.0090 | 0.0015 | 5.630E-09 |
| rs13190235  | 5  | 65964783  | T | C | 0.9036 | -0.0138 | 0.0024 | 5.660E-09 |
| rs1910005   | 5  | 81110866  | T | C | 0.7080 | -0.0090 | 0.0015 | 5.660E-09 |
| rs71646142  | 1  | 212369228 | T | C | 0.1893 | 0.0104  | 0.0018 | 5.690E-09 |
| rs162445    | 5  | 7943246   | A | G | 0.0788 | 0.0152  | 0.0026 | 5.720E-09 |
| rs75756843  | 12 | 110111274 | A | G | 0.0214 | 0.0288  | 0.0049 | 5.790E-09 |
| rs5754581   | 22 | 33910736  | T | C | 0.5542 | -0.0082 | 0.0014 | 5.850E-09 |
| rs13398860  | 2  | 50692940  | A | G | 0.6529 | 0.0086  | 0.0015 | 5.890E-09 |
| rs79585412  | 21 | 46487730  | T | C | 0.9428 | -0.0178 | 0.0031 | 5.920E-09 |
| rs55675587  | 1  | 66224881  | T | C | 0.1926 | -0.0103 | 0.0018 | 5.920E-09 |
| rs42302     | 5  | 74965554  | A | G | 0.3441 | 0.0086  | 0.0015 | 5.960E-09 |
| rs9435340   | 1  | 107593201 | A | T | 0.6615 | 0.0086  | 0.0015 | 5.990E-09 |
| rs7958371   | 12 | 103456084 | A | T | 0.3552 | -0.0085 | 0.0015 | 5.990E-09 |
| rs9649      | 17 | 34050934  | T | C | 0.1749 | 0.0108  | 0.0019 | 6.130E-09 |
| rs912883    | 6  | 41552040  | T | C | 0.6781 | 0.0087  | 0.0015 | 6.200E-09 |
| rs2522545   | 4  | 106378284 | T | C | 0.4083 | -0.0083 | 0.0014 | 6.230E-09 |
| rs6853599   | 4  | 3445610   | T | C | 0.1787 | 0.0108  | 0.0019 | 6.270E-09 |
| rs4904523   | 14 | 89723630  | A | G | 0.5208 | -0.0082 | 0.0014 | 6.270E-09 |
| rs2542673   | 16 | 54206715  | A | C | 0.3243 | 0.0088  | 0.0015 | 6.300E-09 |

|             |    |           |   |   |        |         |        |           |
|-------------|----|-----------|---|---|--------|---------|--------|-----------|
| rs2964255   | 5  | 152052332 | A | G | 0.3066 | 0.0088  | 0.0015 | 6.340E-09 |
| rs17686649  | 6  | 93568527  | T | C | 0.2192 | -0.0098 | 0.0017 | 6.370E-09 |
| rs10782651  | 1  | 77934335  | T | C | 0.5516 | -0.0082 | 0.0014 | 6.370E-09 |
| rs6445633   | 3  | 54230638  | A | C | 0.3127 | 0.0088  | 0.0015 | 6.370E-09 |
| rs17536059  | 11 | 110957335 | C | G | 0.1721 | -0.0108 | 0.0019 | 6.450E-09 |
| rs74453875  | 3  | 52046707  | A | G | 0.0392 | 0.0214  | 0.0037 | 6.480E-09 |
| rs11720093  | 3  | 50562042  | T | C | 0.0809 | 0.0150  | 0.0026 | 6.480E-09 |
| rs13388333  | 2  | 242400597 | A | G | 0.6337 | 0.0085  | 0.0015 | 6.480E-09 |
| rs12952191  | 17 | 52077386  | T | C | 0.4895 | -0.0081 | 0.0014 | 6.520E-09 |
| rs1890132   | 1  | 199427321 | T | C | 0.7056 | -0.0089 | 0.0015 | 6.560E-09 |
| rs4712371   | 6  | 19227667  | A | G | 0.1217 | -0.0124 | 0.0021 | 6.630E-09 |
| rs1505676   | 4  | 62127291  | C | G | 0.6293 | 0.0084  | 0.0015 | 6.670E-09 |
| rs11613431  | 12 | 26684343  | A | G | 0.2620 | -0.0094 | 0.0016 | 6.710E-09 |
| rs4977885   | 9  | 23687983  | A | G | 0.3971 | -0.0084 | 0.0014 | 6.780E-09 |
| rs67790232  | 12 | 46079172  | A | G | 0.7940 | 0.0101  | 0.0017 | 6.900E-09 |
| rs12467175  | 2  | 229189860 | T | C | 0.4923 | -0.0081 | 0.0014 | 6.900E-09 |
| rs10795831  | 10 | 10943379  | T | G | 0.2120 | -0.0099 | 0.0017 | 6.980E-09 |
| rs17148998  | 10 | 10909401  | A | G | 0.2042 | 0.0101  | 0.0017 | 6.980E-09 |
| rs9666728   | 11 | 87907712  | T | C | 0.4427 | -0.0082 | 0.0014 | 7.100E-09 |
| rs6780414   | 3  | 67384670  | T | C | 0.8176 | 0.0105  | 0.0018 | 7.100E-09 |
| rs79997166  | 2  | 161808690 | A | C | 0.9375 | 0.0172  | 0.0030 | 7.140E-09 |
| rs115693355 | 3  | 108284214 | A | G | 0.0192 | 0.0309  | 0.0053 | 7.220E-09 |
| rs13397529  | 2  | 161235981 | C | G | 0.2363 | -0.0097 | 0.0017 | 7.220E-09 |
| rs186456786 | 13 | 58698035  | A | G | 0.9906 | 0.0455  | 0.0079 | 7.260E-09 |
| rs73405293  | 12 | 117522917 | A | G | 0.1516 | 0.0113  | 0.0020 | 7.420E-09 |
| rs12601380  | 17 | 34904985  | A | C | 0.5739 | -0.0082 | 0.0014 | 7.420E-09 |
| rs13212041  | 6  | 78171124  | T | C | 0.7978 | 0.0101  | 0.0018 | 7.420E-09 |
| rs56408528  | 2  | 193706511 | T | C | 0.5121 | -0.0082 | 0.0014 | 7.470E-09 |
| rs3847228   | 9  | 1798805   | T | C | 0.4060 | 0.0083  | 0.0014 | 7.470E-09 |
| rs10996167  | 10 | 66813928  | C | G | 0.6512 | 0.0113  | 0.0020 | 7.470E-09 |
| rs4283754   | 5  | 59570258  | A | G | 0.4787 | -0.0084 | 0.0014 | 7.550E-09 |
| rs4502401   | 2  | 199323526 | T | C | 0.6542 | 0.0085  | 0.0015 | 7.550E-09 |
| rs7146625   | 14 | 84788153  | A | G | 0.7313 | 0.0091  | 0.0016 | 7.550E-09 |
| rs3781339   | 10 | 105428152 | T | C | 0.1962 | -0.0104 | 0.0018 | 7.550E-09 |
| rs2321157   | 13 | 58736901  | A | G | 0.5303 | -0.0081 | 0.0014 | 7.640E-09 |
| rs35111506  | 11 | 65334712  | C | G | 0.9432 | -0.0175 | 0.0030 | 7.900E-09 |
| rs12516990  | 5  | 145927688 | C | G | 0.2106 | -0.0099 | 0.0017 | 7.900E-09 |
| rs11209894  | 1  | 41798668  | A | G | 0.1377 | 0.0119  | 0.0021 | 8.030E-09 |
| rs4787028   | 16 | 7533021   | T | C | 0.6622 | 0.0086  | 0.0015 | 8.080E-09 |
| rs633279    | 6  | 93840705  | A | T | 0.2957 | -0.0089 | 0.0015 | 8.120E-09 |
| rs12304188  | 12 | 97981272  | A | G | 0.8420 | 0.0111  | 0.0019 | 8.170E-09 |
| rs61958175  | 13 | 58680250  | A | G | 0.9538 | -0.0198 | 0.0034 | 8.220E-09 |
| rs28669886  | 12 | 106722701 | A | G | 0.3548 | -0.0084 | 0.0015 | 8.310E-09 |
| rs3790609   | 1  | 113056990 | T | C | 0.1744 | 0.0107  | 0.0019 | 8.350E-09 |
| rs6989141   | 8  | 142681460 | A | G | 0.2080 | 0.0100  | 0.0017 | 8.400E-09 |
| rs2929032   | 8  | 56371745  | A | G | 0.4654 | -0.0081 | 0.0014 | 8.400E-09 |
| rs9916901   | 18 | 40238335  | T | G | 0.7377 | 0.0092  | 0.0016 | 8.400E-09 |
| rs1779549   | 14 | 84640016  | A | C | 0.4600 | 0.0081  | 0.0014 | 8.450E-09 |
| rs75434274  | 7  | 155424887 | A | G | 0.9205 | 0.0151  | 0.0026 | 8.540E-09 |
| rs6428587   | 1  | 90825188  | T | C | 0.6323 | 0.0084  | 0.0015 | 8.590E-09 |
| rs80223410  | 12 | 56367966  | T | C | 0.1426 | -0.0118 | 0.0020 | 8.640E-09 |
| rs72883760  | 11 | 29331969  | A | G | 0.1985 | 0.0101  | 0.0018 | 8.640E-09 |
| rs9294770   | 6  | 68242866  | T | C | 0.3879 | 0.0083  | 0.0014 | 8.740E-09 |
| rs1693584   | 8  | 101748917 | T | C | 0.6856 | -0.0087 | 0.0015 | 8.790E-09 |
| rs7084508   | 10 | 133932946 | T | C | 0.3479 | -0.0085 | 0.0015 | 8.790E-09 |
| rs648044    | 11 | 114030799 | A | G | 0.3892 | 0.0083  | 0.0015 | 8.890E-09 |
| rs8046072   | 16 | 3562075   | A | G | 0.8017 | 0.0101  | 0.0018 | 9.040E-09 |
| rs702606    | 5  | 53167117  | T | C | 0.8654 | 0.0118  | 0.0021 | 9.190E-09 |

|             |    |           |   |   |        |         |        |           |
|-------------|----|-----------|---|---|--------|---------|--------|-----------|
| rs16851779  | 2  | 215189950 | T | C | 0.9246 | -0.0153 | 0.0027 | 9.240E-09 |
| rs13034349  | 2  | 98329197  | T | C | 0.4076 | -0.0082 | 0.0014 | 9.290E-09 |
| rs9870317   | 3  | 182514636 | A | C | 0.3212 | 0.0086  | 0.0015 | 9.350E-09 |
| rs11765387  | 7  | 32494790  | T | C | 0.6734 | 0.0086  | 0.0015 | 9.400E-09 |
| rs2954114   | 12 | 122169884 | A | C | 0.4680 | -0.0081 | 0.0014 | 9.400E-09 |
| rs150537577 | 4  | 705629    | A | G | 0.9195 | -0.0151 | 0.0026 | 9.500E-09 |
| rs4972748   | 2  | 176098010 | T | C | 0.8204 | 0.0105  | 0.0018 | 9.500E-09 |
| rs2314338   | 17 | 38344485  | T | C | 0.7304 | 0.0093  | 0.0016 | 9.500E-09 |
| rs795230    | 11 | 30774525  | T | C | 0.4283 | 0.0081  | 0.0014 | 9.560E-09 |
| rs4915735   | 1  | 61808444  | A | G | 0.1408 | 0.0116  | 0.0020 | 9.560E-09 |
| rs2088913   | 3  | 117310069 | A | G | 0.5732 | 0.0081  | 0.0014 | 9.610E-09 |
| rs12234369  | 7  | 11893275  | A | G | 0.3142 | 0.0087  | 0.0015 | 9.610E-09 |
| rs6043521   | 20 | 15739745  | T | C | 0.6035 | -0.0083 | 0.0014 | 9.720E-09 |
| rs2588959   | 10 | 63598957  | T | C | 0.5019 | -0.0080 | 0.0014 | 9.880E-09 |
| rs17667540  | 2  | 181614913 | A | G | 0.3053 | -0.0087 | 0.0015 | 9.940E-09 |
| rs3766979   | 1  | 181636598 | A | G | 0.3386 | 0.0085  | 0.0015 | 9.940E-09 |
| rs57204268  | 11 | 133844024 | A | G | 0.8497 | 0.0114  | 0.0020 | 9.940E-09 |
| rs6695132   | 1  | 234734655 | T | C | 0.2216 | 0.0097  | 0.0017 | 1.010E-08 |
| rs150421637 | 3  | 51047621  | A | G | 0.0169 | 0.0349  | 0.0061 | 1.040E-08 |
| rs73106136  | 20 | 43491477  | T | G | 0.0828 | -0.0147 | 0.0026 | 1.050E-08 |
| rs10943588  | 6  | 79510994  | A | C | 0.6187 | 0.0084  | 0.0015 | 1.050E-08 |
| rs13026611  | 2  | 128153335 | A | G | 0.3555 | -0.0084 | 0.0015 | 1.050E-08 |
| rs115732722 | 3  | 180691034 | A | G | 0.0101 | -0.0415 | 0.0072 | 1.060E-08 |
| rs3848715   | 20 | 44564682  | A | G | 0.5129 | -0.0080 | 0.0014 | 1.070E-08 |
| rs868456    | 4  | 32150029  | A | G | 0.7117 | 0.0089  | 0.0015 | 1.070E-08 |
| rs548897    | 1  | 57718030  | A | G | 0.4500 | 0.0081  | 0.0014 | 1.100E-08 |
| rs7182216   | 15 | 84422506  | C | G | 0.2277 | -0.0096 | 0.0017 | 1.100E-08 |
| rs61387839  | 2  | 48688635  | A | G | 0.6950 | 0.0088  | 0.0015 | 1.110E-08 |
| rs2126069   | 11 | 115473374 | T | C | 0.4773 | 0.0080  | 0.0014 | 1.110E-08 |
| rs73457936  | 9  | 23233667  | A | G | 0.9151 | 0.0144  | 0.0025 | 1.110E-08 |
| rs2011603   | 4  | 18025484  | A | G | 0.7359 | -0.0091 | 0.0016 | 1.120E-08 |
| rs72993796  | 2  | 240321051 | T | C | 0.8836 | 0.0127  | 0.0022 | 1.120E-08 |
| rs7714719   | 5  | 106498927 | C | G | 0.8602 | 0.0116  | 0.0020 | 1.120E-08 |
| rs10169002  | 2  | 140563368 | A | G | 0.5305 | -0.0080 | 0.0014 | 1.150E-08 |
| rs6744040   | 2  | 49908151  | A | G | 0.5117 | -0.0080 | 0.0014 | 1.150E-08 |
| rs6711399   | 2  | 200462840 | T | C | 0.1779 | -0.0107 | 0.0019 | 1.160E-08 |
| rs117398064 | 12 | 26523628  | C | G | 0.0912 | -0.0141 | 0.0025 | 1.160E-08 |
| rs182902112 | 5  | 153304758 | A | C | 0.0186 | -0.0300 | 0.0053 | 1.170E-08 |
| rs8066044   | 17 | 1367352   | A | G | 0.2712 | 0.0090  | 0.0016 | 1.170E-08 |
| rs62252819  | 3  | 53440128  | A | T | 0.7522 | -0.0094 | 0.0017 | 1.200E-08 |
| rs4730020   | 7  | 104189082 | T | C | 0.2697 | 0.0090  | 0.0016 | 1.210E-08 |
| rs9974899   | 21 | 42006441  | T | C | 0.2538 | -0.0093 | 0.0016 | 1.220E-08 |
| rs1554798   | 2  | 156835059 | A | C | 0.4667 | -0.0080 | 0.0014 | 1.220E-08 |
| rs73082325  | 3  | 48981024  | C | G | 0.9701 | -0.0252 | 0.0044 | 1.240E-08 |
| rs339057    | 7  | 128376900 | A | G | 0.4185 | -0.0081 | 0.0014 | 1.260E-08 |
| rs6752228   | 2  | 161547697 | T | G | 0.5523 | -0.0080 | 0.0014 | 1.260E-08 |
| rs61757207  | 16 | 70358495  | A | G | 0.9854 | 0.0359  | 0.0063 | 1.270E-08 |
| rs6461536   | 7  | 21131807  | A | G | 0.7118 | 0.0088  | 0.0015 | 1.280E-08 |
| rs2469226   | 15 | 77246990  | A | T | 0.2228 | 0.0096  | 0.0017 | 1.280E-08 |
| rs2976397   | 8  | 143764613 | T | G | 0.4317 | 0.0081  | 0.0014 | 1.300E-08 |
| rs61748951  | 1  | 156038058 | A | C | 0.0239 | -0.0273 | 0.0048 | 1.310E-08 |
| rs1728118   | 6  | 108029518 | A | C | 0.7272 | 0.0089  | 0.0016 | 1.320E-08 |
| rs4894658   | 3  | 173928736 | C | G | 0.2619 | 0.0091  | 0.0016 | 1.340E-08 |
| rs563954    | 11 | 132391656 | A | G | 0.4639 | -0.0081 | 0.0014 | 1.340E-08 |
| rs387027    | 16 | 12085343  | A | C | 0.3609 | -0.0083 | 0.0015 | 1.360E-08 |
| rs114958262 | 3  | 108039298 | T | C | 0.0350 | -0.0220 | 0.0039 | 1.360E-08 |
| rs13009915  | 2  | 100423158 | T | C | 0.0378 | 0.0212  | 0.0037 | 1.360E-08 |
| rs10793903  | 9  | 134976652 | A | G | 0.1146 | 0.0126  | 0.0022 | 1.370E-08 |



|             |    |           |   |   |        |         |        |           |
|-------------|----|-----------|---|---|--------|---------|--------|-----------|
| rs1066769   | 2  | 189580148 | A | G | 0.0311 | -0.0230 | 0.0041 | 1.380E-08 |
| rs10499535  | 7  | 21690606  | A | G | 0.5013 | 0.0080  | 0.0014 | 1.400E-08 |
| rs6951996   | 7  | 96646437  | A | T | 0.0522 | -0.0182 | 0.0032 | 1.410E-08 |
| rs35745455  | 7  | 5824100   | A | G | 0.5010 | 0.0080  | 0.0014 | 1.430E-08 |
| rs2977464   | 8  | 141545193 | T | C | 0.1869 | 0.0102  | 0.0018 | 1.460E-08 |
| rs382196    | 3  | 9145554   | T | G | 0.3814 | -0.0082 | 0.0014 | 1.470E-08 |
| rs10444280  | 11 | 41155897  | T | C | 0.7982 | 0.0100  | 0.0018 | 1.470E-08 |
| rs713584    | 5  | 136416957 | A | G | 0.4248 | -0.0080 | 0.0014 | 1.480E-08 |
| rs7030373   | 9  | 121161926 | A | G | 0.2074 | -0.0098 | 0.0017 | 1.490E-08 |
| rs117895796 | 12 | 49729637  | T | C | 0.0143 | 0.0362  | 0.0064 | 1.510E-08 |
| rs66721975  | 2  | 191701185 | A | G | 0.2903 | -0.0087 | 0.0015 | 1.510E-08 |
| rs36085856  | 15 | 70379236  | C | G | 0.0734 | 0.0201  | 0.0036 | 1.520E-08 |
| rs2131167   | 12 | 99633189  | A | G | 0.4458 | 0.0080  | 0.0014 | 1.520E-08 |
| rs116967397 | 13 | 58466434  | A | C | 0.9829 | 0.0315  | 0.0056 | 1.530E-08 |
| rs78714229  | 6  | 25793055  | T | C | 0.9436 | 0.0172  | 0.0030 | 1.550E-08 |
| rs9597907   | 13 | 59496462  | T | C | 0.0738 | 0.0152  | 0.0027 | 1.560E-08 |
| rs11155813  | 6  | 152149435 | T | C | 0.8937 | -0.0129 | 0.0023 | 1.570E-08 |
| rs214626    | 9  | 135718584 | A | G | 0.1894 | 0.0101  | 0.0018 | 1.580E-08 |
| rs1220779   | 7  | 54734673  | A | G | 0.4679 | -0.0079 | 0.0014 | 1.580E-08 |
| rs9926649   | 16 | 66750040  | T | G | 0.0528 | 0.0177  | 0.0031 | 1.580E-08 |
| rs347661    | 5  | 62549141  | T | C | 0.4347 | -0.0081 | 0.0014 | 1.580E-08 |
| rs10074178  | 5  | 93927705  | A | G | 0.5129 | 0.0079  | 0.0014 | 1.580E-08 |
| rs111370527 | 9  | 96203756  | T | C | 0.0785 | 0.0151  | 0.0027 | 1.610E-08 |
| rs1392816   | 1  | 66481188  | T | C | 0.3831 | 0.0082  | 0.0014 | 1.610E-08 |
| rs111530150 | 13 | 54342123  | T | C | 0.0228 | 0.0269  | 0.0048 | 1.620E-08 |
| rs2098526   | 2  | 162845276 | A | G | 0.0279 | -0.0241 | 0.0043 | 1.620E-08 |
| rs4735297   | 8  | 95589340  | A | G | 0.6741 | -0.0086 | 0.0015 | 1.620E-08 |
| rs4793090   | 17 | 40686342  | A | G | 0.6635 | 0.0084  | 0.0015 | 1.670E-08 |
| rs13016316  | 2  | 225337188 | A | C | 0.0908 | -0.0138 | 0.0024 | 1.670E-08 |
| rs72919450  | 2  | 81999568  | T | C | 0.0997 | -0.0132 | 0.0023 | 1.670E-08 |
| rs78648104  | 6  | 50683009  | T | C | 0.9137 | -0.0141 | 0.0025 | 1.700E-08 |
| rs6792805   | 3  | 118675196 | A | G | 0.7356 | -0.0090 | 0.0016 | 1.700E-08 |
| rs7899270   | 10 | 111258134 | A | C | 0.6524 | -0.0084 | 0.0015 | 1.740E-08 |
| rs11190955  | 10 | 103112165 | T | C | 0.3540 | -0.0083 | 0.0015 | 1.740E-08 |
| rs142014757 | 18 | 77511268  | A | G | 0.8085 | 0.0102  | 0.0018 | 1.740E-08 |
| rs73039077  | 3  | 17036387  | C | G | 0.2471 | 0.0092  | 0.0016 | 1.750E-08 |
| rs13266287  | 8  | 17871598  | A | T | 0.6687 | -0.0085 | 0.0015 | 1.750E-08 |
| rs34967082  | 2  | 215382654 | A | G | 0.4161 | -0.0080 | 0.0014 | 1.770E-08 |
| rs62007304  | 15 | 77723195  | A | C | 0.9753 | 0.0264  | 0.0047 | 1.800E-08 |
| rs9291437   | 4  | 22165255  | C | G | 0.3907 | -0.0081 | 0.0014 | 1.820E-08 |
| rs13361043  | 5  | 58318963  | T | C | 0.9329 | -0.0158 | 0.0028 | 1.840E-08 |
| rs76167224  | 12 | 56507702  | T | C | 0.9487 | -0.0187 | 0.0033 | 1.880E-08 |
| rs12953422  | 18 | 31192529  | A | G | 0.5847 | -0.0080 | 0.0014 | 1.890E-08 |
| rs57016874  | 2  | 220310112 | T | C | 0.0387 | 0.0209  | 0.0037 | 1.900E-08 |
| rs2183271   | 10 | 21957229  | T | C | 0.6364 | 0.0084  | 0.0015 | 1.910E-08 |
| rs72824753  | 6  | 14619148  | T | C | 0.9005 | 0.0133  | 0.0024 | 1.930E-08 |
| rs34624793  | 2  | 144916804 | T | C | 0.8636 | 0.0116  | 0.0021 | 1.940E-08 |
| rs138096147 | 3  | 48179876  | A | G | 0.0323 | 0.0234  | 0.0042 | 1.950E-08 |
| rs73219806  | 8  | 26279173  | A | C | 0.1683 | 0.0106  | 0.0019 | 1.970E-08 |
| rs6946136   | 7  | 135423424 | A | G | 0.6116 | 0.0081  | 0.0014 | 1.990E-08 |
| rs17170519  | 7  | 32861230  | C | G | 0.8991 | 0.0132  | 0.0023 | 1.990E-08 |
| rs113205706 | 7  | 39246987  | A | G | 0.0944 | -0.0135 | 0.0024 | 2.000E-08 |
| rs1196760   | 12 | 105606068 | C | G | 0.9105 | 0.0139  | 0.0025 | 2.000E-08 |
| rs7766240   | 6  | 16954368  | T | C | 0.0964 | -0.0134 | 0.0024 | 2.000E-08 |
| rs17069646  | 5  | 167452251 | T | C | 0.6881 | 0.0085  | 0.0015 | 2.010E-08 |
| rs13169187  | 5  | 51716957  | A | G | 0.5374 | -0.0079 | 0.0014 | 2.010E-08 |
| rs72709560  | 4  | 178540163 | A | G | 0.6865 | 0.0085  | 0.0015 | 2.030E-08 |
| rs322744    | 7  | 127780401 | T | C | 0.2609 | -0.0090 | 0.0016 | 2.040E-08 |

|             |    |           |   |   |        |         |        |           |
|-------------|----|-----------|---|---|--------|---------|--------|-----------|
| rs61798586  | 4  | 36691695  | A | C | 0.1444 | -0.0112 | 0.0020 | 2.050E-08 |
| rs10480450  | 7  | 108283606 | A | G | 0.9341 | 0.0158  | 0.0028 | 2.050E-08 |
| rs77826402  | 2  | 100251389 | T | C | 0.0730 | 0.0151  | 0.0027 | 2.050E-08 |
| rs10192834  | 2  | 207725616 | T | C | 0.6550 | 0.0083  | 0.0015 | 2.050E-08 |
| rs16958559  | 17 | 55659233  | T | G | 0.7865 | 0.0096  | 0.0017 | 2.070E-08 |
| rs10789285  | 1  | 69788482  | T | G | 0.7542 | 0.0091  | 0.0016 | 2.070E-08 |
| rs2416214   | 5  | 108943485 | A | C | 0.4367 | 0.0079  | 0.0014 | 2.090E-08 |
| rs710629    | 12 | 67697856  | A | G | 0.6450 | 0.0082  | 0.0015 | 2.090E-08 |
| rs11733439  | 4  | 30534692  | A | G | 0.7883 | -0.0096 | 0.0017 | 2.100E-08 |
| rs73034295  | 11 | 133822133 | A | G | 0.2016 | 0.0099  | 0.0018 | 2.110E-08 |
| rs6543810   | 2  | 34380023  | T | C | 0.3771 | 0.0082  | 0.0015 | 2.110E-08 |
| rs10927053  | 1  | 243811321 | A | T | 0.8886 | -0.0125 | 0.0022 | 2.130E-08 |
| rs11265191  | 1  | 159400359 | T | C | 0.3346 | 0.0083  | 0.0015 | 2.140E-08 |
| rs80037907  | 8  | 87170913  | T | C | 0.1589 | -0.0107 | 0.0019 | 2.160E-08 |
| rs17650634  | 2  | 139420392 | T | C | 0.8287 | -0.0104 | 0.0019 | 2.190E-08 |
| rs190102446 | 18 | 57048571  | T | C | 0.0364 | -0.0210 | 0.0037 | 2.190E-08 |
| rs11596387  | 10 | 103606122 | T | G | 0.0246 | 0.0258  | 0.0046 | 2.200E-08 |
| rs111235962 | 1  | 20871750  | T | C | 0.0962 | 0.0133  | 0.0024 | 2.210E-08 |
| rs11591870  | 10 | 65494036  | T | C | 0.7980 | 0.0098  | 0.0017 | 2.250E-08 |
| rs1955250   | 4  | 118514236 | A | C | 0.9137 | -0.0140 | 0.0025 | 2.260E-08 |
| rs1747817   | 1  | 197711492 | T | C | 0.7614 | -0.0092 | 0.0016 | 2.290E-08 |
| rs9611597   | 22 | 41864190  | A | T | 0.8350 | -0.0107 | 0.0019 | 2.300E-08 |
| rs10949263  | 6  | 14886977  | A | G | 0.2443 | -0.0091 | 0.0016 | 2.330E-08 |
| rs7965154   | 12 | 23697725  | A | C | 0.3062 | -0.0085 | 0.0015 | 2.330E-08 |
| rs113720505 | 13 | 57477706  | A | G | 0.0659 | 0.0164  | 0.0029 | 2.340E-08 |
| rs399821    | 3  | 21500324  | A | G | 0.5321 | -0.0078 | 0.0014 | 2.340E-08 |
| rs60726488  | 10 | 110882068 | T | C | 0.2561 | -0.0090 | 0.0016 | 2.350E-08 |
| rs113731629 | 4  | 170984229 | T | C | 0.9859 | 0.0339  | 0.0061 | 2.360E-08 |
| rs10192369  | 2  | 161380888 | A | G | 0.4960 | -0.0078 | 0.0014 | 2.360E-08 |
| rs78702390  | 7  | 68618770  | C | G | 0.0583 | 0.0167  | 0.0030 | 2.380E-08 |
| rs1861786   | 12 | 14000467  | A | G | 0.3813 | -0.0081 | 0.0014 | 2.390E-08 |
| rs884108    | 1  | 204591237 | A | G | 0.2220 | -0.0094 | 0.0017 | 2.390E-08 |
| rs17440885  | 1  | 67208622  | A | G | 0.9352 | 0.0160  | 0.0029 | 2.420E-08 |
| rs1006749   | 20 | 41716653  | A | G | 0.5237 | 0.0079  | 0.0014 | 2.430E-08 |
| rs11845781  | 14 | 89276431  | T | C | 0.5552 | -0.0079 | 0.0014 | 2.430E-08 |
| rs2092248   | 6  | 19205458  | T | C | 0.3310 | -0.0083 | 0.0015 | 2.430E-08 |
| rs7218235   | 17 | 2564267   | A | G | 0.2135 | -0.0097 | 0.0017 | 2.440E-08 |
| rs317050    | 4  | 35446302  | T | C | 0.5048 | 0.0078  | 0.0014 | 2.500E-08 |
| rs113552169 | 5  | 60644403  | C | G | 0.9816 | 0.0294  | 0.0053 | 2.510E-08 |
| rs4255791   | 16 | 28274804  | A | G | 0.3301 | -0.0084 | 0.0015 | 2.510E-08 |
| rs8030487   | 15 | 97119595  | A | G | 0.6907 | 0.0085  | 0.0015 | 2.520E-08 |
| rs66482320  | 21 | 42688931  | C | G | 0.8880 | 0.0124  | 0.0022 | 2.570E-08 |
| rs13168136  | 5  | 26898629  | A | G | 0.7668 | -0.0092 | 0.0017 | 2.570E-08 |
| rs11720985  | 3  | 122214045 | T | C | 0.3060 | 0.0085  | 0.0015 | 2.570E-08 |
| rs4925065   | 17 | 19914546  | T | C | 0.5214 | -0.0078 | 0.0014 | 2.590E-08 |
| rs10251438  | 7  | 137006969 | A | C | 0.4955 | 0.0078  | 0.0014 | 2.650E-08 |
| rs11213482  | 11 | 110435636 | A | G | 0.8360 | -0.0106 | 0.0019 | 2.680E-08 |
| rs1518890   | 3  | 34271042  | T | C | 0.2542 | -0.0090 | 0.0016 | 2.680E-08 |
| rs8192465   | 7  | 99566007  | A | G | 0.0218 | -0.0272 | 0.0049 | 2.690E-08 |
| rs7561705   | 2  | 143446472 | A | G | 0.4720 | 0.0078  | 0.0014 | 2.710E-08 |
| rs7226824   | 18 | 27676827  | T | C | 0.5305 | -0.0078 | 0.0014 | 2.720E-08 |
| rs7875078   | 9  | 14494845  | A | C | 0.4564 | -0.0078 | 0.0014 | 2.720E-08 |
| rs1905616   | 8  | 93235675  | A | G | 0.3270 | 0.0083  | 0.0015 | 2.740E-08 |
| rs6736025   | 2  | 58797634  | T | G | 0.4354 | 0.0079  | 0.0014 | 2.770E-08 |
| rs11640569  | 16 | 48791392  | A | G | 0.1420 | 0.0112  | 0.0020 | 2.770E-08 |
| rs7630133   | 3  | 123923288 | A | G | 0.6553 | 0.0082  | 0.0015 | 2.800E-08 |
| rs6567288   | 18 | 60218334  | A | G | 0.5719 | -0.0079 | 0.0014 | 2.810E-08 |
| rs9633970   | 11 | 132502212 | T | C | 0.7606 | 0.0091  | 0.0016 | 2.810E-08 |

|             |    |           |   |   |        |         |        |           |
|-------------|----|-----------|---|---|--------|---------|--------|-----------|
| rs6706275   | 2  | 240265617 | T | C | 0.3246 | 0.0083  | 0.0015 | 2.810E-08 |
| rs2989751   | 9  | 96366647  | A | G | 0.2440 | -0.0092 | 0.0017 | 2.890E-08 |
| rs34309     | 5  | 67564383  | A | G | 0.3816 | 0.0080  | 0.0014 | 2.940E-08 |
| rs72972965  | 2  | 140454376 | A | C | 0.3496 | 0.0083  | 0.0015 | 2.940E-08 |
| rs12765185  | 10 | 134977077 | A | T | 0.2769 | -0.0088 | 0.0016 | 2.960E-08 |
| rs115438240 | 2  | 185883877 | T | G | 0.9435 | -0.0169 | 0.0030 | 2.960E-08 |
| rs2718277   | 7  | 74133929  | T | C | 0.0832 | 0.0142  | 0.0026 | 2.990E-08 |
| rs4938815   | 11 | 120441647 | T | G | 0.7041 | 0.0085  | 0.0015 | 2.990E-08 |
| rs7716161   | 5  | 72179574  | C | G | 0.1696 | 0.0105  | 0.0019 | 3.000E-08 |
| rs1368250   | 2  | 157485517 | T | C | 0.0284 | 0.0250  | 0.0045 | 3.000E-08 |
| rs10122669  | 9  | 116555771 | A | G | 0.4143 | -0.0079 | 0.0014 | 3.000E-08 |
| rs12574281  | 11 | 131205421 | A | C | 0.6310 | -0.0080 | 0.0015 | 3.040E-08 |
| rs9300612   | 13 | 101283219 | T | C | 0.6944 | 0.0084  | 0.0015 | 3.070E-08 |
| rs9442750   | 6  | 72886012  | A | G | 0.7439 | -0.0089 | 0.0016 | 3.150E-08 |
| rs2299156   | 7  | 50764404  | T | C | 0.1890 | 0.0099  | 0.0018 | 3.150E-08 |
| rs2082317   | 4  | 171824549 | T | C | 0.5301 | -0.0078 | 0.0014 | 3.190E-08 |
| rs6091570   | 20 | 51299884  | A | G | 0.3491 | 0.0081  | 0.0015 | 3.200E-08 |
| rs57661533  | 12 | 78629917  | T | C | 0.1341 | -0.0114 | 0.0021 | 3.240E-08 |
| rs2736752   | 3  | 60817322  | T | G | 0.7869 | 0.0095  | 0.0017 | 3.240E-08 |
| rs114192810 | 4  | 17969142  | T | G | 0.9801 | -0.0279 | 0.0051 | 3.260E-08 |
| rs1051860   | 14 | 58838668  | A | G | 0.4071 | -0.0079 | 0.0014 | 3.290E-08 |
| rs6689641   | 1  | 110720400 | A | G | 0.4556 | 0.0078  | 0.0014 | 3.290E-08 |
| rs10181071  | 2  | 142862830 | A | G | 0.8265 | 0.0102  | 0.0019 | 3.310E-08 |
| rs78116078  | 1  | 18434125  | C | G | 0.7180 | 0.0086  | 0.0016 | 3.330E-08 |
| rs4846010   | 1  | 11531059  | A | G | 0.2128 | 0.0099  | 0.0018 | 3.350E-08 |
| rs2994326   | 1  | 243651026 | T | C | 0.1852 | -0.0100 | 0.0018 | 3.380E-08 |
| rs10032941  | 4  | 15402115  | T | C | 0.6365 | -0.0080 | 0.0015 | 3.420E-08 |
| rs11663678  | 18 | 42908726  | T | C | 0.8842 | -0.0121 | 0.0022 | 3.420E-08 |
| rs2958182   | 18 | 53149021  | A | T | 0.3414 | 0.0082  | 0.0015 | 3.460E-08 |
| rs2276209   | 18 | 36942457  | A | C | 0.7040 | 0.0085  | 0.0015 | 3.490E-08 |
| rs117668569 | 7  | 112816099 | T | G | 0.9718 | 0.0234  | 0.0042 | 3.490E-08 |
| rs4724083   | 7  | 42007071  | T | C | 0.3227 | 0.0083  | 0.0015 | 3.530E-08 |
| rs62409395  | 4  | 25605036  | T | C | 0.7755 | 0.0101  | 0.0018 | 3.550E-08 |
| rs10983324  | 9  | 119485337 | A | C | 0.3041 | 0.0084  | 0.0015 | 3.550E-08 |
| rs12473986  | 2  | 173682948 | T | C | 0.2907 | -0.0085 | 0.0015 | 3.570E-08 |
| rs72881110  | 2  | 44754020  | A | T | 0.0753 | 0.0146  | 0.0027 | 3.590E-08 |
| rs10509251  | 10 | 67828436  | T | C | 0.2200 | -0.0093 | 0.0017 | 3.610E-08 |
| rs77370942  | 13 | 58037032  | A | G | 0.0751 | -0.0147 | 0.0027 | 3.650E-08 |
| rs74615093  | 16 | 69122043  | A | G | 0.0772 | 0.0145  | 0.0026 | 3.670E-08 |
| rs4850954   | 2  | 101573214 | T | C | 0.4628 | 0.0077  | 0.0014 | 3.730E-08 |
| rs36120534  | 20 | 17438121  | T | C | 0.1811 | 0.0100  | 0.0018 | 3.770E-08 |
| rs35192107  | 5  | 145705669 | T | G | 0.7621 | -0.0091 | 0.0017 | 3.770E-08 |
| rs10264573  | 7  | 1944591   | A | G | 0.9446 | 0.0175  | 0.0032 | 3.790E-08 |
| rs628993    | 11 | 61539691  | A | G | 0.1073 | 0.0128  | 0.0023 | 3.830E-08 |
| rs3809169   | 12 | 113911532 | T | C | 0.9128 | 0.0140  | 0.0025 | 3.850E-08 |
| rs62506104  | 8  | 31020008  | A | G | 0.1923 | -0.0098 | 0.0018 | 3.930E-08 |
| rs911149    | 20 | 58214637  | T | C | 0.2357 | 0.0091  | 0.0017 | 3.930E-08 |
| rs10810145  | 9  | 14430692  | A | G | 0.4144 | 0.0078  | 0.0014 | 4.000E-08 |
| rs7823700   | 8  | 42363231  | T | C | 0.0987 | 0.0132  | 0.0024 | 4.000E-08 |
| rs663251    | 1  | 70566021  | T | G | 0.6532 | 0.0081  | 0.0015 | 4.020E-08 |
| rs1445591   | 1  | 72960011  | A | G | 0.6986 | 0.0085  | 0.0015 | 4.020E-08 |
| rs2718791   | 3  | 180931395 | T | C | 0.6452 | -0.0081 | 0.0015 | 4.020E-08 |
| rs10128888  | 12 | 97799524  | A | G | 0.3149 | -0.0083 | 0.0015 | 4.040E-08 |
| rs17732878  | 17 | 7362359   | T | C | 0.7912 | -0.0095 | 0.0017 | 4.060E-08 |
| rs191903670 | 3  | 48578053  | A | T | 0.9836 | 0.0335  | 0.0061 | 4.080E-08 |
| rs6881733   | 5  | 92586991  | T | C | 0.2870 | -0.0086 | 0.0016 | 4.080E-08 |
| rs10799615  | 1  | 20541370  | A | G | 0.2525 | -0.0089 | 0.0016 | 4.110E-08 |
| rs3817923   | 1  | 171809211 | A | G | 0.1133 | -0.0121 | 0.0022 | 4.110E-08 |

|             |    |           |   |   |        |         |        |           |
|-------------|----|-----------|---|---|--------|---------|--------|-----------|
| rs853286    | 3  | 64285502  | T | G | 0.8921 | 0.0124  | 0.0023 | 4.130E-08 |
| rs163229    | 2  | 45157163  | C | G | 0.9775 | -0.0260 | 0.0047 | 4.130E-08 |
| rs59813324  | 12 | 60879673  | T | G | 0.1983 | 0.0097  | 0.0018 | 4.150E-08 |
| rs2521602   | 17 | 42336424  | A | G | 0.0219 | -0.0266 | 0.0049 | 4.170E-08 |
| rs2416845   | 9  | 124755432 | T | C | 0.9775 | 0.0263  | 0.0048 | 4.190E-08 |
| rs11592299  | 10 | 104225941 | A | G | 0.1958 | 0.0097  | 0.0018 | 4.190E-08 |
| rs9877225   | 3  | 70631590  | T | C | 0.7617 | 0.0090  | 0.0016 | 4.220E-08 |
| rs1146079   | 12 | 62485472  | C | G | 0.7373 | -0.0087 | 0.0016 | 4.240E-08 |
| rs78918150  | 2  | 117611525 | T | C | 0.6227 | -0.0080 | 0.0015 | 4.260E-08 |
| rs10995639  | 10 | 65573195  | T | C | 0.4199 | 0.0078  | 0.0014 | 4.260E-08 |
| rs11076962  | 16 | 5811367   | T | C | 0.7189 | 0.0086  | 0.0016 | 4.290E-08 |
| rs9492774   | 6  | 131302489 | C | G | 0.3692 | 0.0080  | 0.0015 | 4.330E-08 |
| rs9446060   | 6  | 69552271  | A | G | 0.5566 | 0.0077  | 0.0014 | 4.330E-08 |
| rs116386746 | 2  | 61018515  | C | G | 0.0249 | 0.0249  | 0.0045 | 4.350E-08 |
| rs936496    | 13 | 36100541  | A | G | 0.6229 | -0.0079 | 0.0014 | 4.380E-08 |
| rs78365243  | 1  | 211737950 | T | C | 0.9513 | 0.0181  | 0.0033 | 4.380E-08 |
| rs67661275  | 11 | 132662671 | A | G | 0.9103 | 0.0134  | 0.0025 | 4.400E-08 |
| rs13050131  | 21 | 20018118  | A | C | 0.6647 | -0.0081 | 0.0015 | 4.400E-08 |
| rs4263475   | 5  | 26774142  | A | G | 0.5814 | 0.0078  | 0.0014 | 4.400E-08 |
| rs10985402  | 9  | 124578782 | T | G | 0.2472 | 0.0089  | 0.0016 | 4.470E-08 |
| rs9821664   | 3  | 127003110 | A | G | 0.2105 | 0.0094  | 0.0017 | 4.520E-08 |
| rs2436760   | 6  | 40374288  | T | C | 0.9717 | 0.0232  | 0.0042 | 4.520E-08 |
| rs11657979  | 17 | 32900837  | A | G | 0.2449 | -0.0091 | 0.0017 | 4.570E-08 |
| rs73154546  | 22 | 34271689  | A | C | 0.0401 | 0.0197  | 0.0036 | 4.570E-08 |
| rs143148393 | 14 | 84896824  | T | G | 0.0350 | -0.0211 | 0.0039 | 4.620E-08 |
| rs9844755   | 3  | 78440564  | A | G | 0.3354 | 0.0083  | 0.0015 | 4.640E-08 |
| rs13117856  | 4  | 174008759 | A | T | 0.7054 | 0.0084  | 0.0015 | 4.640E-08 |
| rs12238011  | 9  | 14210897  | T | C | 0.0809 | -0.0141 | 0.0026 | 4.670E-08 |
| rs76957677  | 10 | 105030157 | T | C | 0.0192 | -0.0297 | 0.0054 | 4.720E-08 |
| rs7672622   | 4  | 157705551 | A | G | 0.7459 | -0.0088 | 0.0016 | 4.720E-08 |
| rs115017135 | 5  | 26896955  | A | C | 0.0409 | -0.0206 | 0.0038 | 4.720E-08 |
| rs1898111   | 15 | 47892298  | A | G | 0.8245 | 0.0101  | 0.0018 | 4.720E-08 |
| rs2252098   | 20 | 51620301  | T | C | 0.4703 | -0.0077 | 0.0014 | 4.740E-08 |
| rs58950082  | 7  | 53857821  | T | C | 0.7867 | 0.0095  | 0.0017 | 4.770E-08 |
| rs10402747  | 19 | 45815248  | T | C | 0.5175 | 0.0077  | 0.0014 | 4.790E-08 |
| rs56306882  | 3  | 70253693  | A | G | 0.2741 | 0.0086  | 0.0016 | 4.820E-08 |
| rs2569041   | 5  | 167510357 | T | C | 0.5421 | 0.0077  | 0.0014 | 4.850E-08 |
| rs72672052  | 8  | 115798424 | A | T | 0.1753 | -0.0101 | 0.0018 | 4.870E-08 |
| rs187951956 | 1  | 98412713  | A | T | 0.0154 | -0.0315 | 0.0058 | 4.870E-08 |
| rs11647188  | 16 | 82648514  | A | G | 0.6066 | 0.0079  | 0.0014 | 4.920E-08 |
| rs73055556  | 3  | 28027538  | A | G | 0.1385 | 0.0111  | 0.0020 | 4.950E-08 |
| rs2055940   | 4  | 46997913  | A | G | 0.3215 | 0.0082  | 0.0015 | 4.950E-08 |
| rs780569    | 1  | 4569436   | A | T | 0.7201 | -0.0085 | 0.0016 | 4.980E-08 |

**Supplementary Table 3** Pleiotropy tested by MR- Egger intercept

|                             | Egger intercept | Se       | P value |
|-----------------------------|-----------------|----------|---------|
| <b>Amount</b>               |                 |          |         |
| All                         | 9.15E-05        | 8.63E-04 | 0.92    |
| Women                       | 2.13E-03        | 1.06E-03 | 0.05    |
| Men                         | -2.22E-03       | 1.04E-03 | 0.03    |
| Nonsmoker                   | -4.93E-04       | 9.85E-04 | 0.62    |
| Current or past smokers     | 1.01E-03        | 1.05E-03 | 0.34    |
| Lower income                | 3.73E-04        | 1.19E-03 | 0.75    |
| Higher income               | 3.97E-04        | 9.65E-04 | 0.68    |
| Lower education year        | 2.36E-04        | 1.08E-03 | 0.83    |
| Higher education year       | 3.38E-05        | 9.85E-04 | 0.97    |
| <b>Red wine</b>             |                 |          |         |
| All                         | -1.15E-04       | 4.07E-04 | 0.78    |
| Women                       | 4.32E-04        | 5.15E-04 | 0.40    |
| Men                         | -6.11E-04       | 5.50E-04 | 0.27    |
| Nonsmoker                   | -8.84E-04       | 4.76E-04 | 0.06    |
| Current or past smokers     | 7.37E-04        | 5.70E-04 | 0.20    |
| Lower income                | -3.51E-04       | 5.89E-04 | 0.55    |
| Higher income               | 2.69E-04        | 5.07E-04 | 0.60    |
| Lower education year        | -3.68E-04       | 5.33E-04 | 0.49    |
| Higher education year       | 8.63E-05        | 5.19E-04 | 0.87    |
| <b>White wine/champagne</b> |                 |          |         |
| All                         | 3.63E-04        | 3.58E-04 | 0.31    |
| Women                       | 5.93E-05        | 5.17E-04 | 0.91    |
| Men                         | 6.71E-04        | 4.45E-04 | 0.13    |
| Nonsmoker                   | 1.89E-04        | 4.47E-04 | 0.67    |
| Current or past smokers     | 5.35E-04        | 5.07E-04 | 0.29    |
| Lower income                | 6.92E-04        | 5.04E-04 | 0.17    |
| Higher income               | 3.57E-04        | 4.78E-04 | 0.46    |
| Lower education year        | 5.45E-04        | 4.72E-04 | 0.25    |
| Higher education year       | 1.49E-04        | 4.73E-04 | 0.75    |
| <b>Fortified</b>            |                 |          |         |
| All                         | 2.93E-04        | 1.30E-04 | 0.02    |
| Women                       | 4.89E-04        | 1.97E-04 | 0.01    |
| Men                         | 1.08E-04        | 1.60E-04 | 0.50    |
| Nonsmoker                   | 1.92E-04        | 1.81E-04 | 0.29    |
| Current or past smokers     | 3.59E-04        | 1.73E-04 | 0.04    |
| Lower income                | 2.17E-04        | 2.23E-04 | 0.33    |
| Higher income               | 2.46E-04        | 1.68E-04 | 0.14    |
| Lower education year        | 4.77E-04        | 1.84E-04 | 0.01    |
| Higher education year       | 1.14E-04        | 1.75E-04 | 0.51    |
| <b>Beer</b>                 |                 |          |         |
| All                         | 1.33E-04        | 3.69E-04 | 0.72    |
| Women                       | 2.99E-06        | 2.96E-04 | 0.99    |
| Men                         | 2.06E-04        | 6.03E-04 | 0.73    |
| Nonsmoker                   | 7.46E-05        | 4.01E-04 | 0.85    |
| Current or past smokers     | 3.58E-04        | 4.99E-04 | 0.47    |
| Lower income                | -3.60E-04       | 5.47E-04 | 0.51    |
| Higher income               | 5.63E-04        | 4.40E-04 | 0.20    |
| Lower education year        | 2.07E-04        | 4.60E-04 | 0.65    |
| Higher education year       | 1.03E-04        | 4.39E-04 | 0.81    |
| <b>Spirits</b>              |                 |          |         |
| All                         | 4.76E-04        | 3.35E-04 | 0.15    |
| Women                       | 6.92E-04        | 4.21E-04 | 0.10    |
| Men                         | 2.80E-04        | 4.67E-04 | 0.55    |
| Nonsmoker                   | 1.43E-04        | 3.72E-04 | 0.70    |
| Current or past smokers     | 9.57E-04        | 4.85E-04 | 0.05    |

*Continued*

---

|                                 |           |          |      |
|---------------------------------|-----------|----------|------|
| Lower income                    | 8.39E-04  | 5.28E-04 | 0.11 |
| Higher income                   | 2.94E-05  | 4.13E-04 | 0.94 |
| Lower education year            | 6.48E-04  | 4.71E-04 | 0.17 |
| Higher education year           | 3.06E-04  | 4.18E-04 | 0.46 |
| <b>Frequency</b>                |           |          |      |
| All                             | 2.20E-04  | 6.67E-04 | 0.74 |
| Women                           | 1.37E-03  | 8.25E-04 | 0.10 |
| Men                             | -1.10E-03 | 7.61E-04 | 0.15 |
| Nonsmoker                       | 1.18E-04  | 7.48E-04 | 0.88 |
| Current or past smokers         | 4.06E-04  | 8.20E-04 | 0.62 |
| Lower income                    | 9.88E-04  | 8.72E-04 | 0.26 |
| Higher income                   | 1.14E-04  | 7.30E-04 | 0.88 |
| Lower education year            | 5.75E-04  | 8.16E-04 | 0.48 |
| Higher education year           | -1.52E-04 | 7.63E-04 | 0.84 |
| <b>Alcohol taken with meals</b> |           |          |      |
| All                             | 2.32E-04  | 1.21E-03 | 0.85 |
| Women                           | 2.71E-04  | 1.59E-03 | 0.86 |
| Men                             | 2.41E-04  | 1.48E-03 | 0.87 |
| Nonsmoker                       | -1.24E-03 | 1.51E-03 | 0.41 |
| Current or past smokers         | 1.17E-03  | 1.55E-03 | 0.45 |
| Lower income                    | -5.24E-04 | 1.63E-03 | 0.75 |
| Higher income                   | 1.23E-03  | 1.61E-03 | 0.45 |
| Lower education year            | 5.20E-04  | 1.51E-03 | 0.73 |
| Higher education year           | -3.62E-04 | 1.60E-03 | 0.82 |

---

## Reference

- 1 Lee JJ, Wedow R, Okbay A, *et al.* Gene discovery and polygenic prediction from a genome-wide association study of educational attainment in 1.1 million individuals. *Nat Genet* 2018;**50**:1112–21. doi:10.1038/s41588-018-0147-3
